# Supplementary material
Source: PubMed Central journal article supplement (PMC4333205)
Supplement: NIHMS61220-supplement-Supplementary_Information.pdf [file NIHMS61220-supplement-Supplementary_Information.pdf]

## Supplementary Information

### Supplementary note:

#### Sample collections for Stage 1

**Singapore:** Cases of primary angle closure glaucoma (PACG) included patients with chronic PACG or those with acute PACG. Chronic PACG was defined as the presence of appositional angle closure for  $> 180$  degrees with (a) peripheral anterior synechiae and/ or (b) raised intraocular pressure associated with glaucomatous optic neuropathy (defined as loss of neuroretinal rim with a vertical cup: disc ratio of  $> 0.7$  or an inter-eye asymmetry of  $> 0.2$ , and/or notching attributable to glaucoma). Patients with acute PACG had a previous symptomatic episode defined as the presence of at least two of the following symptoms: ocular or periocular pain, nausea or vomiting or both, and an antecedent history of intermittent blurring of vision with haloes; a presenting intraocular pressure of more than 30 mmHg on Goldmann applanation tonometry; and the presence of at least three of the following signs: conjunctival injection, corneal epithelial edema, mid-dilated unreactive pupil, and shallow anterior chamber. Patients diagnosed with secondary angle closure (such as neovascular or uveitic glaucoma) were excluded. All Singapore PACG cases for Stage 1 were recruited between years 2005 – 2010. Controls were ascertained from an on-going population based study of Chinese persons aged 40 years and older (the Singapore Chinese Eye Study [SCES]). The SCES is a population-based, cross-sectional study of Chinese adults residing in the south- western part of Singapore. The Ministry of Home Affairs of Singapore provided an initial computer-generated list ethnic Chinese names of adults aged 40-80+ years of age. A final sampling frame of 6,350 ethnic Chinese residents was derived from this list using an age-stratified random sampling strategy. A control was defined as IOP  $\leq 21$  mm Hg with open angles, healthy optic nerves and normal visual fields, and no previous intraocular surgery.

**Hong Kong:** Patients with PACG were defined using the same criteria as that in the Singaporean GWAS collection. All subjects of the Hong Kong study population were recruited from the Prince of Wales Hospital and the Hong Kong Eye Hospital, Hong Kong. A total of 303 PACG patients of Han Chinese ancestry were recruited. The controls comprised of 225 Hong Kong Chinese and 976 Guangdong Chinese of Han ancestry, of which 1,049 were genotyped (73 from Hong Kong and 976 from Guangdong) and 1,044 passed quality checks (73 Hong Kong and 971 from Guangdong). The Hong Kong control subjects were recruited in a hospital-based manner. They were all given complete ocular examinations, and confirmed to have no sign of glaucoma, angle closure or narrow angle, or other major eye diseases except for mild cataract and mild refractive errors. Control subjects were recruited from elderly

people aged  $\geq 60$  years to ensure they were at least free of early-onset major eye diseases. They had IOP  $< 21$  mmHg, and had no known family history of glaucoma. Additional healthy controls were recruited from local communities in the Guangdong province of Southern China<sup>1</sup>.

**Vietnam:** PACG cases were recruited from the Vietnam National Institute of Ophthalmology in Hanoi, Vietnam. They were defined using the same criteria as that in the Singaporean GWAS collection. The controls comprise 2,018 cord bloods, previously described<sup>2</sup>.

**Malaysia:** PACG cases were recruited from the Department of Ophthalmology, School of Medical Sciences, Universiti Sains Malaysia, Kota Bharu, Kelantan, Malaysia. They were defined using the same criteria as that in the Singaporean GWAS collection. The controls were a population-based collection of healthy ethnic Malays recruited from Singapore (N = 3065), previously described<sup>3</sup>.

**India:** 337 PACG cases (as defined above) of South Indian ancestry were recruited from a large population based cross sectional study, the Chennai Glaucoma study, and from the outpatient department of the Medical Research Foundation, Sankara Nethralaya, Chennai, India. All PACG cases had peripheral anterior synechiae on gonioscopy, and were identified prior to laser iridotomy. The Chennai Glaucoma study recruited 7851 persons from rural and urban cohorts in the Southern Indian state of Tamil Nadu<sup>4</sup>. The controls were a population-based collection of healthy ethnic Indians recruited from Singapore (N = 2538), previously described<sup>5</sup>.

### Sample collections for Stage 2

**Beijing:** PACG patients were recruited from the Beijing Tongren Hospital, Xingtai Eye Hospital and Anyang Eye Hospital, China. The diagnostic criteria for PACG were as described above. Controls were recruited from the Handan Eye Study (HES), a population-based study of eye disease in rural Chinese aged 30 years and over. The criteria for selecting controls are also as described above.

**Singapore:** All PACG cases and controls were recruited using the exact same criteria from Stage 1. They were recruited from year 2010 onwards.

**India:** 80 PACG cases (as defined above for Stage 1) were recruited from the outpatient department of the Medical Research Foundation, Sankara Nethralaya, Chennai, India and 309 unrelated healthy controls were recruited from the Chennai Glaucoma study. A control was defined as IOP  $\leq 21$  mm Hg with open angles, healthy optic nerves and normal visual fields, and no previous intraocular surgery.

**UK:** Cases of PACG in the UK were defined using the same criteria as that in the Singaporean GWAS collection. All subjects were of UK European descent and were recruited from Moorfields Eye Hospital, London UK. A total of 132 cases were genotyped and 127 passed quality checks. The controls comprised of 4,703 healthy individuals of UK European descent, recruited and genotyped by the Wellcome Trust Case-Control Consortium 2. Their extensive use for genetics studies (such as ankylosing spondylitis, psoriasis, ulcerative colitis, ischaemic stroke, Meningococcal sepsis, and Kawasaki disease) has been well-described<sup>6-11</sup>.

**Saudi Arabia:** PACG cases and controls were collected at the glaucoma clinic at King Abdulaziz University Hospital (KAUH), Department of Ophthalmology, College of Medicine, King Saud University, Riyadh, Saudi Arabia. They were defined using the same criteria as that in the Singaporean GWAS collection. All patients and controls were unrelated Saudi Arabs, all whose known ancestors were of Saudi Arabian origin. As judged by the family names, PACG patients and controls were representative of the five provinces of the Kingdom of Saudi Arabia.

**Shantou:** PACG cases and controls were collected at the glaucoma clinic of the Chinese University of Hong Kong Joint Shantou International Eye Centre, Shantou, China. They were defined using the same criteria as that in the Singaporean GWAS collection, and were of Chinese descent.

#### Distinction between acute angle closure glaucoma and chronic angle closure glaucoma

Approximately 40% of patients in this study were acute angle closure glaucoma (ACG) whilst the remaining patients had chronic ACG.

The unifying characteristic of all these patients is that the cause of their angle closure is not secondary to any other pathology (hence classified as primary) and that all patients have gonioscopic angle closure with significant disease severity.

The clinical classification of acute and chronic ACG, which is based on reported symptoms in patients, is subjective and likely to be affected by recall bias. Further scenarios may blur the distinctions; patients with chronic ACG may have had intermittent angle closure or subclinical episodes before; acute attacks may occur on a background of chronic ACG, and patients with acute ACG may proceed to develop chronic ACG as a result of persistently raised intraocular pressure (IOP).

The International Society of Geographical and Epidemiological Ophthalmology (ISGEO)<sup>12</sup> recommended a revised approach to classification of ACG which does not include symptoms, i.e. does not differentiate between acute and chronic ACG. This

approach was supported by a subsequent report which reported a high rate of symptoms traditionally associated with acute ACG in an unaffected normal population<sup>13</sup>. The ISGEO approach to classification is now the standard approach to classification of ACG, and centers on the concept that:

- Primary angle-closure disease is contact between iris and trabecular meshwork outflow channels occurring in the absence of any other ocular pathology
- This contact is sufficient to significantly obstruct aqueous fluid outflow, causing elevated IOP
- Symptoms are a poor indicator of the presence or absence of disease, and unrelated to the natural history of the disease

We therefore grouped acute and chronic ACG cases together in this analysis as the thrust of our study was to study the molecular biology of development of PACG.

### Supplementary Table 1

GWAS (Stage 1) and Replication (Stage 2) results for the 15 SNPs from Stage 1 brought forward for further assessment in Stage 2. Dashes indicate failed genotyping in Stage 2.

| Chr | SNP        | GWAS<br>(Stage 1) |      |                         | Replication<br>(Stage 2) |                         | All data<br>(Stages 1 + 2) |                          |             |                       |
|-----|------------|-------------------|------|-------------------------|--------------------------|-------------------------|----------------------------|--------------------------|-------------|-----------------------|
|     |            | A1                | OR   | <i>P</i>                | OR                       | <i>P</i>                | OR                         | <i>P</i>                 | <i>Phet</i> | <i>I</i> <sup>2</sup> |
| 11  | rs11024102 | G                 | 1.27 | 1.43 x 10 <sup>-8</sup> | 1.18                     | 3.72 x 10 <sup>-5</sup> | 1.22                       | 5.33 x 10 <sup>-12</sup> | 0.64        | 0%                    |
| 1   | rs3753841  | G                 | 1.22 | 2.82 x 10 <sup>-6</sup> | 1.18                     | 6.62 x 10 <sup>-5</sup> | 1.2                        | 9.22 x 10 <sup>-10</sup> | 0.59        | 0%                    |
| 8   | rs1015213  | A                 | 1.56 | 3.90 x 10 <sup>-6</sup> | 1.44                     | 1.77 x 10 <sup>-4</sup> | 1.5                        | 3.29 x 10 <sup>-9</sup>  | 0.19        | 19.00%                |
| 22  | rs3788317  | A                 | 0.76 | 2.27 x 10 <sup>-7</sup> | 0.89                     | 0.028                   | 0.82                       | 1.73 x 10 <sup>-7</sup>  | 0.41        | 3.17%                 |
| 5   | rs2114950  | G                 | 1.31 | 1.31 x 10 <sup>-6</sup> | 1.01                     | 0.89                    | 1.16                       | 3.38 x 10 <sup>-4</sup>  | 0.059       | 45.14%                |
| 5   | rs3149     | C                 | 1.33 | 2.04 x 10 <sup>-7</sup> | -                        | -                       | -                          | -                        | -           | -                     |
| 7   | rs3816415  | A                 | 1.30 | 9.13 x 10 <sup>-6</sup> | -                        | -                       | -                          | -                        | -           | -                     |
| 11  | rs2729389  | A                 | 1.39 | 1.97 x 10 <sup>-7</sup> | 0.96                     | 0.49                    | 1.14                       | 0.00226                  | 0.0025      | 63.14%                |
| 1   | rs10881542 | A                 | 0.81 | 6.38 x 10 <sup>-7</sup> | 0.93                     | 0.21                    | 0.85                       | 1.76 x 10 <sup>-6</sup>  | 0.35        | 10.43%                |
| 1   | rs12035919 | A                 | 0.81 | 4.79 x 10 <sup>-7</sup> | 1.00                     | 0.95                    | 0.90                       | 3.86 x 10 <sup>-4</sup>  | 0.0081      | 59.56%                |
| 4   | rs1037644  | A                 | 0.69 | 5.02 x 10 <sup>-6</sup> | 1.00                     | 0.95                    | 0.86                       | 0.00379                  | 0.020       | 54.19%                |
| 4   | rs13129984 | A                 | 0.69 | 9.32 x 10 <sup>-6</sup> | 0.99                     | 0.93                    | 0.85                       | 0.00317                  | 0.0082      | 59.49%                |
| 6   | rs675497   | G                 | 1.24 | 9.64 x 10 <sup>-7</sup> | -                        | -                       | -                          | -                        | -           | -                     |
| 4   | rs224463   | A                 | 1.22 | 4.39 x 10 <sup>-6</sup> | 1.00                     | 0.95                    | 1.11                       | 8.65 x 10 <sup>-4</sup>  | 0.064       | 44.31%                |
| 22  | rs1052978  | G                 | 0.65 | 7.63 x 10 <sup>-6</sup> | -                        | -                       | -                          | -                        | -           | -                     |

## Supplementary Table 2

Per-collection details of the three sequence variants showing genome-wide significant association with susceptibility to PACG.

| SNP                    | Collection             | Geno Case   | Geno Cont     | MAF Case     | MAF Cont | OR          | P                                                                          |                                                                              |
|------------------------|------------------------|-------------|---------------|--------------|----------|-------------|----------------------------------------------------------------------------|------------------------------------------------------------------------------|
| rs11024102             | Singapore              | 176/464/343 | 122/431/390   | 0.415        | 0.358    | 1.27        | $2.79 \times 10^{-4}$                                                      |                                                                              |
|                        | Hong Kong              | 48/142/107  | 118/481/445   | 0.400        | 0.344    | 1.24        | 0.032                                                                      |                                                                              |
|                        | India                  | 42/153/143  | 256/1024/1255 | 0.351        | 0.303    | 1.25        | 0.011                                                                      |                                                                              |
|                        | Malaysia               | 20/39/24    | 430/1425/1202 | 0.476        | 0.374    | 1.63        | 0.0013                                                                     |                                                                              |
|                        | Vietnam                | 24/67/62    | 231/913/872   | 0.376        | 0.341    | 1.20        | 0.15                                                                       |                                                                              |
|                        | <b>Stage 1 summary</b> |             |               |              |          |             | <b>1.27</b>                                                                | <b><math>1.43 \times 10^{-8}</math> (<math>2.93 \times 10^{-9}</math>)</b>   |
|                        | China (Beijing)        | 217/486/289 | 315/813/543   | 0.464        | 0.432    | 1.14        | 0.024                                                                      |                                                                              |
|                        | Singapore              | 54/134/111  | 197/710/572   | 0.405        | 0.373    | 1.14        | 0.15                                                                       |                                                                              |
|                        | China (Shantou)        | 52/112/80   | 96/274/232    | 0.443        | 0.387    | 1.24        | 0.035                                                                      |                                                                              |
|                        | India                  | 12/39/28    | 29/127/153    | 0.399        | 0.299    | 1.55        | 0.019                                                                      |                                                                              |
|                        | Saudi Arabia           | 3/23/139    | 1/18/156      | 0.088        | 0.057    | 1.53        | 0.14                                                                       |                                                                              |
|                        | United Kingdom         | 14/56/57    | 395/1962/2339 | 0.331        | 0.293    | 1.19        | 0.19                                                                       |                                                                              |
|                        | <b>Stage 2 summary</b> |             |               |              |          |             | <b>1.18</b>                                                                | <b><math>3.72 \times 10^{-5}</math></b>                                      |
|                        | <b>All samples</b>     |             |               |              |          |             | <b>1.22</b>                                                                | <b><math>5.33 \times 10^{-12}</math> (<math>1.27 \times 10^{-12}</math>)</b> |
|                        | rs1015213              | Singapore   | 2/41/941      | 0/18/925     | 0.023    | 0.0095      | 2.37                                                                       | 0.0019                                                                       |
|                        |                        | Hong Kong   | 0/10/287      | 1/26/1014    | 0.017    | 0.014       | 1.26                                                                       | 0.54                                                                         |
|                        |                        | India       | 7/98/233      | 40/540/1957  | 0.166    | 0.122       | 1.43                                                                       | 0.0041                                                                       |
| Malaysia               |                        | 1/13/69     | 7/233/2823    | 0.09         | 0.04     | 2.01        | 0.018                                                                      |                                                                              |
| Vietnam                |                        | 0/5/148     | 0/42/1975     | 0.016        | 0.01     | 1.43        | 0.48                                                                       |                                                                              |
| <b>Stage 1 summary</b> |                        |             |               |              |          | <b>1.56</b> | <b><math>3.90 \times 10^{-6}</math> (<math>1.27 \times 10^{-5}</math>)</b> |                                                                              |
| China (Beijing)        |                        | 0/54/938    | 5/59/1603     | 0.027        | 0.021    | 1.30        | 0.14                                                                       |                                                                              |
| Singapore              |                        | 0/11/293    | 0/41/1438     | 0.018        | 0.014    | 1.32        | 0.43                                                                       |                                                                              |
| China (Shantou)        |                        | 0/9/236     | 0/20/581      | 0.018        | 0.017    | 1.11        | 0.8                                                                        |                                                                              |
| India                  |                        | 2/15/63     | 5/69/234      | 0.119        | 0.128    | 0.92        | 0.75                                                                       |                                                                              |
| Saudi Arabia           |                        | 7/51/107    | 1/31/142      | 0.197        | 0.095    | 2.34        | $2.72 \times 10^{-4}$                                                      |                                                                              |
| United Kingdom         |                        | 2/30/95     | 44/746/3911   | 0.134        | 0.089    | 1.57        | 0.013                                                                      |                                                                              |
| <b>Stage 2 summary</b> |                        |             |               |              |          | <b>1.44</b> | <b><math>1.77 \times 10^{-4}</math></b>                                    |                                                                              |
| <b>All samples</b>     |                        |             |               |              |          | <b>1.5</b>  | <b><math>3.29 \times 10^{-9}</math> (<math>9.10 \times 10^{-9}</math>)</b> |                                                                              |
| rs3753841              |                        | Singapore   | 142/413/426   | 91/415/437   | 0.355    | 0.317       | 1.18                                                                       | 0.014                                                                        |
|                        |                        | Hong Kong   | 30/154/113    | 116/466/462  | 0.361    | 0.344       | 1.11                                                                       | 0.31                                                                         |
|                        |                        | India       | 87/159/92     | 496/1229/812 | 0.493    | 0.438       | 1.26                                                                       | 0.012                                                                        |
|                        | Malaysia               | 16/36/31    | 261/1279/1524 | 0.41         | 0.294    | 1.52        | 0.0099                                                                     |                                                                              |
|                        | Vietnam                | 19/74/60    | 182/861/974   | 0.366        | 0.304    | 1.33        | 0.027                                                                      |                                                                              |
|                        | <b>Stage 1 summary</b> |             |               |              |          |             | <b>1.22</b>                                                                | <b><math>2.82 \times 10^{-6}</math> (<math>4.47 \times 10^{-5}</math>)</b>   |
|                        | China (Beijing)        | 107/413/472 | 142/701/829   | 0.316        | 0.295    | 1.11        | 0.10                                                                       |                                                                              |
|                        | Singapore              | 42/120/136  | 152/622/705   | 0.342        | 0.313    | 1.14        | 0.16                                                                       |                                                                              |
|                        | China (Shantou)        | 31/112/102  | 59/244/296    | 0.355        | 0.302    | 1.26        | 0.03                                                                       |                                                                              |
|                        | India                  | 19/46/15    | 61/159/89     | 0.525        | 0.455    | 1.35        | 0.1                                                                        |                                                                              |
|                        | Saudi Arabia           | 35/79/51    | 54/81/40      | 0.548        | 0.46     | 1.40        | 0.026                                                                      |                                                                              |
|                        | United Kingdom         | 25/62/40    | 753/2126/1823 | 0.441        | 0.386    | 1.24        | 0.077                                                                      |                                                                              |
|                        | <b>Stage 2 summary</b> |             |               |              |          |             | <b>1.18</b>                                                                | <b><math>6.62 \times 10^{-5}</math></b>                                      |
|                        | <b>All samples</b>     |             |               |              |          |             | <b>1.20</b>                                                                | <b><math>9.22 \times 10^{-10}</math> (<math>1.2 \times 10^{-8}</math>)</b>   |

Geno Case: Genotype counts in PACG cases

Geno Cont: Genotype counts in controls

For Stage 1 summary, the  $P$ -values in parenthesis were obtained using joint analysis when the total number of 1,854 cases and 9,608 controls were analyzed together with joint correction for genetic stratification along the top 4 axes of ancestry.

For the summary on all samples, the  $P$ -values in parenthesis were obtained using the Joint Stage 1  $P$ -value (in parenthesis) together with the Stage 2  $P$ -value.

### Supplementary Table 3

Conditional logistic regression analysis at the *PLEKHA7* locus on Chromosome 11; the conditioning SNP is rs11024102.

| SNP        | BP       | A1 | Before conditioning     |      | After conditioning |      |
|------------|----------|----|-------------------------|------|--------------------|------|
|            |          |    | P                       | OR   | P                  | OR   |
| rs11024102 | 16965181 | G  | 7.97 x 10 <sup>-9</sup> | 1.28 | -                  | -    |
| rs6486334  | 16972133 | A  | 9.07 x 10 <sup>-8</sup> | 1.25 | 0.027              | 0.84 |
| rs3950680  | 17095242 | A  | 9.67 x 10 <sup>-5</sup> | 1.18 | 0.63               | 0.97 |
| rs12577525 | 17216692 | A  | 1.04 x 10 <sup>-4</sup> | 1.18 | 0.73               | 0.98 |
| rs10832757 | 17292907 | G  | 2.27 x 10 <sup>-4</sup> | 1.17 | 0.22               | 1.06 |
| rs2354867  | 17327277 | A  | 5.50 x 10 <sup>-4</sup> | 1.16 | 0.19               | 1.06 |
| rs10766383 | 17286374 | C  | 6.39 x 10 <sup>-4</sup> | 1.16 | 0.33               | 1.05 |
| rs4756887  | 17351173 | A  | 8.96 x 10 <sup>-4</sup> | 1.15 | 0.34               | 1.05 |
| rs214105   | 17270097 | G  | 9.10 x 10 <sup>-4</sup> | 1.15 | 0.96               | 1.00 |
| rs7127347  | 17257420 | C  | 0.0011                  | 0.87 | 0.30               | 0.95 |
| rs1330     | 17272605 | A  | 0.0030                  | 1.13 | 0.87               | 0.99 |
| rs366590   | 16829016 | A  | 0.0055                  | 1.14 | 0.020              | 1.12 |
| rs1557765  | 17360215 | A  | 0.021                   | 1.10 | 0.64               | 0.98 |
| rs757110   | 17375053 | C  | 0.035                   | 1.09 | 0.89               | 0.99 |
| rs2285676  | 17364601 | A  | 0.036                   | 1.09 | 0.95               | 1.00 |



### Supplementary Table 4

Conditional logistic regression analysis at the *COL11A1* locus on Chromosome 1; the conditioning SNP is rs3753841.

| SNP        | BP        | A1 | Before conditioning     |      | After conditioning |      |
|------------|-----------|----|-------------------------|------|--------------------|------|
|            |           |    | P                       | OR   | P                  | OR   |
| rs3753841  | 103152506 | G  | 3.85 x 10 <sup>-6</sup> | 1.22 | -                  | -    |
| rs1676486  | 103126726 | A  | 1.09 x 10 <sup>-5</sup> | 1.22 | 0.11               | 1.11 |
| rs12138977 | 103166045 | G  | 2.34 x 10 <sup>-5</sup> | 1.21 | 0.76               | 1.03 |
| rs7550513  | 102994366 | A  | 3.04 x 10 <sup>-5</sup> | 1.21 | 0.06               | 1.11 |
| rs2229783  | 103125039 | A  | 3.50 x 10 <sup>-5</sup> | 1.19 | 0.95               | 1.01 |
| rs12074523 | 103040347 | A  | 4.99 x 10 <sup>-5</sup> | 1.20 | 0.14               | 1.08 |
| rs713162   | 102989469 | A  | 6.89 x 10 <sup>-5</sup> | 1.18 | 0.52               | 1.05 |
| rs1020918  | 103103937 | A  | 1.25 x 10 <sup>-4</sup> | 1.18 | 0.65               | 1.03 |
| rs1241163  | 103128353 | A  | 1.47 x 10 <sup>-4</sup> | 1.18 | 0.51               | 1.04 |
| rs1085     | 103128756 | A  | 1.86 x 10 <sup>-4</sup> | 1.18 | 0.33               | 1.07 |
| rs921416   | 103001167 | G  | 2.76 x 10 <sup>-4</sup> | 1.16 | 0.76               | 1.02 |
| rs8179334  | 103139683 | A  | 4.36 x 10 <sup>-4</sup> | 1.18 | 0.79               | 1.02 |
| rs12030173 | 102949180 | C  | 9.44 x 10 <sup>-4</sup> | 1.17 | 0.16               | 1.08 |
| rs9659030  | 103114980 | G  | 0.0011                  | 1.16 | 0.59               | 1.03 |
| rs1241202  | 103077609 | C  | 0.0012                  | 1.15 | 0.98               | 1.00 |
| rs12022173 | 102874238 | G  | 0.0016                  | 1.17 | 0.17               | 1.08 |
| rs11164556 | 102852775 | A  | 0.0051                  | 1.14 | 0.47               | 1.04 |
| rs10874639 | 102906497 | G  | 0.0083                  | 1.13 | 0.43               | 1.04 |
| rs11164585 | 102944531 | A  | 0.010                   | 1.13 | 0.34               | 1.05 |
| rs1376359  | 102975695 | A  | 0.012                   | 1.11 | 0.88               | 1.01 |
| rs4907975  | 102802807 | G  | 0.021                   | 1.10 | 0.99               | 1.00 |
| rs7539441  | 102793412 | G  | 0.033                   | 1.09 | 0.92               | 1.00 |
| rs2222748  | 103530366 | G  | 0.036                   | 1.16 | 0.22               | 1.09 |
| rs967554   | 102836762 | G  | 0.039                   | 1.09 | 0.69               | 0.98 |
| rs11164544 | 102785098 | G  | 0.041                   | 0.92 | 0.77               | 0.99 |
| rs7517663  | 102781216 | G  | 0.044                   | 0.92 | 0.78               | 0.99 |

### Supplementary Table 5

Conditional logistic regression analysis at the *PCMTD1-ST18* locus on Chromosome 8; the conditioning SNP is rs1015213.

| SNP        | BP       | A1 | Before conditioning     |      | After conditioning |      |
|------------|----------|----|-------------------------|------|--------------------|------|
|            |          |    | P                       | OR   | P                  | OR   |
| rs1015213  | 53050094 | A  | 9.38 x 10 <sup>-6</sup> | 1.53 | -                  | -    |
| rs7846408  | 52523096 | A  | 3.80 x 10 <sup>-4</sup> | 0.84 | 0.0013             | 0.85 |
| rs9792278  | 52593356 | G  | 0.0016                  | 0.88 | 0.0023             | 0.88 |
| rs13271514 | 52561732 | G  | 0.0040                  | 0.88 | 0.0094             | 0.89 |
| rs2017341  | 52516457 | A  | 0.0040                  | 1.23 | 0.0041             | 1.23 |
| rs10111115 | 52778748 | G  | 0.0054                  | 1.15 | 0.13               | 1.08 |
| rs16916394 | 52555316 | A  | 0.0074                  | 0.87 | 0.013              | 0.88 |
| rs16916425 | 52582435 | G  | 0.010                   | 0.75 | 0.013              | 0.76 |
| rs2304365  | 53292766 | A  | 0.013                   | 0.85 | 0.013              | 0.85 |
| rs12155844 | 53292222 | G  | 0.015                   | 0.85 | 0.013              | 0.85 |
| rs7830945  | 53295719 | G  | 0.027                   | 0.85 | 0.045              | 0.86 |
| rs11786371 | 52598500 | G  | 0.029                   | 0.90 | 0.047              | 0.90 |
| rs7000275  | 52602042 | A  | 0.047                   | 0.90 | 0.072              | 0.91 |

## Supplementary Table 6

Stage 1 association tests (1,854 PACG cases vs 9,608 controls) looking up previously reported susceptibility loci in Primary Open Angle Glaucoma (POAG).

| Chr. | SNP        | Gene             | A1 | Collection  | <i>P</i> | OR   | <i>P</i> <sub>het</sub> | <i>i</i> <sup>2</sup> |
|------|------------|------------------|----|-------------|----------|------|-------------------------|-----------------------|
| 7    | rs4236601  | <b>CAV1-CAV2</b> | A  | Singapore   | 0.088    | 1.70 | 0.37                    | 6.14%                 |
|      |            |                  |    | Hong Kong   | 0.31     | 0.60 |                         |                       |
|      |            |                  |    | India       | 0.16     | 1.16 |                         |                       |
|      |            |                  |    | Vietnam     | 0.63     | 0.77 |                         |                       |
|      |            |                  |    | Malays      | 0.73     | 0.87 |                         |                       |
|      |            |                  |    | All Stage 1 | 0.26     | 1.13 |                         |                       |
| 7    | rs1052990  | <b>CAV1-CAV2</b> | C  | Singapore   | 0.63     | 0.96 | 0.3875                  | 3.37%                 |
|      |            |                  |    | Hong Kong   | 0.56     | 0.92 |                         |                       |
|      |            |                  |    | India       | 0.26     | 1.11 |                         |                       |
|      |            |                  |    | Vietnam     | 0.090    | 1.31 |                         |                       |
|      |            |                  |    | Malays      | 0.79     | 1.07 |                         |                       |
|      |            |                  |    | All Stage 1 | 0.42     | 1.05 |                         |                       |
| 9    | rs4977756  | <b>CDKN2BAS</b>  | G  | Singapore   | 0.079    | 0.87 | 0.0253                  | 64.03%                |
|      |            |                  |    | Hong Kong   | 0.20     | 0.86 |                         |                       |
|      |            |                  |    | India       | 0.013    | 1.26 |                         |                       |
|      |            |                  |    | Vietnam     | 0.77     | 0.96 |                         |                       |
|      |            |                  |    | Malays      | 0.65     | 1.09 |                         |                       |
|      |            |                  |    | All Stage 1 | 0.93     | 0.99 |                         |                       |
| 9    | rs10120688 | <b>CDKN2BAS</b>  | G  | Singapore   | 0.30     | 0.93 | 0.1624                  | 38.82%                |
|      |            |                  |    | Hong Kong   | 0.33     | 0.90 |                         |                       |
|      |            |                  |    | India       | 0.052    | 1.18 |                         |                       |
|      |            |                  |    | Vietnam     | 0.40     | 1.14 |                         |                       |
|      |            |                  |    | Malays      | 0.77     | 0.95 |                         |                       |
|      |            |                  |    | All Stage 1 | 0.86     | 1.01 |                         |                       |
| 1    | rs10800150 | <b>TMCO1</b>     | A  | Singapore   | 0.53     | 0.96 | 0.0385                  | 60.46%                |
|      |            |                  |    | Hong Kong   | 0.017    | 1.26 |                         |                       |
|      |            |                  |    | India       | 0.19     | 1.18 |                         |                       |
|      |            |                  |    | Vietnam     | 0.017    | 1.35 |                         |                       |
|      |            |                  |    | Malays      | 0.11     | 1.31 |                         |                       |
|      |            |                  |    | All Stage 1 | 0.039    | 1.17 |                         |                       |
| 1    | rs2790051  | <b>TMCO1</b>     | A  | Singapore   | 0.41     | 0.93 |                         |                       |
|      |            |                  |    | Hong Kong   | 0.12     | 1.20 |                         |                       |

|    |            |             |   |             |        |      |        |        |
|----|------------|-------------|---|-------------|--------|------|--------|--------|
|    |            |             |   | India       | 0.12   | 1.14 |        |        |
|    |            |             |   | Vietnam     | 0.0011 | 1.56 |        |        |
|    |            |             |   | Malays      | 0.97   | 1.01 |        |        |
|    |            |             |   | All Stage 1 | 0.12   | 1.14 | 0.0225 | 64.87% |
| 14 | rs10483727 | <b>SIX1</b> | G | Singapore   | 0.12   | 1.13 |        |        |
|    |            |             |   | Hong Kong   | 0.076  | 1.23 |        |        |
|    |            |             |   | India       | 0.042  | 0.84 |        |        |
|    |            |             |   | Vietnam     | 0.034  | 0.72 |        |        |
|    |            |             |   | Malays      | 0.36   | 0.82 |        |        |
|    |            |             |   | All Stage 1 | 0.62   | 0.95 | 0.0047 | 73.34% |

*P*: *P*-value for association with PACG.

OR: per-allele odds ratio for the effect allele (A1).

$P_{\text{het}}$ : *P*-value for heterogeneity in Stage 1 meta-analysis.

$I^2$ : I-squared index for heterogeneity.

## Supplementary Table 7

Stage 1 association results for SNPs at the 3 previously reported nanophthalmos loci. SNPs with Stage 1  $P < 0.01$  are shown here. Overall, a total of 9,301 SNPs from *NNO1*, 13 SNPs from *NNO2*, and 4,606 SNPs from *NNO3* were present in our Stage 1 GWAS data.

| SNP        | CHR | BP       | A1 | OR   | $P$                   | $P_{\text{het}}$ | $I^2$ | Locus       |
|------------|-----|----------|----|------|-----------------------|------------------|-------|-------------|
| rs11024102 | 11  | 16965181 | G  | 1.27 | $1.43 \times 10^{-8}$ | 0.47             | 0     | <i>NNO1</i> |
| rs6486334  | 11  | 16972133 | A  | 1.25 | $9.07 \times 10^{-8}$ | 0.91             | 0     | <i>NNO1</i> |
| rs3950680  | 11  | 17095242 | A  | 1.18 | $9.67 \times 10^{-5}$ | 0.96             | 0     | <i>NNO1</i> |
| rs12577525 | 11  | 17216692 | A  | 1.18 | 0.00010               | 0.88             | 0     | <i>NNO1</i> |
| rs353630   | 11  | 35144767 | A  | 0.72 | 0.00013               | 0.82             | 0     | <i>NNO1</i> |
| rs10832757 | 11  | 17292907 | G  | 1.17 | 0.00023               | 0.82             | 0     | <i>NNO1</i> |
| rs2354867  | 11  | 17327277 | A  | 1.16 | 0.00055               | 0.49             | 0     | <i>NNO1</i> |
| rs10766383 | 11  | 17286374 | C  | 1.16 | 0.00064               | 0.73             | 0     | <i>NNO1</i> |
| rs11022262 | 11  | 12216931 | A  | 0.78 | 0.00067               | 0.87             | 0     | <i>NNO1</i> |
| rs214105   | 11  | 17270097 | G  | 1.15 | 0.00091               | 0.72             | 0     | <i>NNO1</i> |
| rs2745879  | 11  | 32029355 | G  | 0.81 | 0.00121               | 0.68             | 0     | <i>NNO1</i> |
| rs879346   | 11  | 45037021 | A  | 0.76 | 0.00124               | 0.69             | 0     | <i>NNO1</i> |
| rs4752926  | 11  | 46649446 | A  | 0.87 | 0.00136               | 0.81             | 0     | <i>NNO1</i> |
| rs11602755 | 11  | 45034487 | G  | 0.77 | 0.00164               | 0.75             | 0     | <i>NNO1</i> |
| rs4756887  | 11  | 17351173 | A  | 1.16 | 0.00176               | 0.32             | 14.87 | <i>NNO1</i> |
| rs7106548  | 11  | 17550285 | G  | 0.88 | 0.00266               | 0.79             | 0     | <i>NNO1</i> |
| rs901555   | 11  | 11311920 | A  | 1.22 | 0.00278               | 0.56             | 0     | <i>NNO1</i> |
| rs4910413  | 11  | 11701087 | C  | 1.15 | 0.00283               | 0.80             | 0     | <i>NNO1</i> |
| rs11025951 | 11  | 21139294 | G  | 0.68 | 0.00295               | 0.58             | 0     | <i>NNO1</i> |
| rs10838502 | 11  | 1636686  | A  | 1.26 | 0.00332               | 0.77             | 0     | <i>NNO1</i> |
| rs2361069  | 11  | 7865203  | G  | 0.83 | 0.00348               | 0.50             | 0     | <i>NNO1</i> |
| rs7950226  | 11  | 13274715 | G  | 1.13 | 0.00351               | 0.95             | 0     | <i>NNO1</i> |
| rs10833053 | 11  | 19045326 | C  | 0.89 | 0.00367               | 0.93             | 0     | <i>NNO1</i> |
| rs1231637  | 11  | 29486823 | A  | 1.13 | 0.00386               | 0.48             | 0     | <i>NNO1</i> |
| rs933930   | 11  | 12499458 | A  | 0.86 | 0.00418               | 0.29             | 19.48 | <i>NNO1</i> |
| rs7127347  | 11  | 17257420 | C  | 0.87 | 0.00424               | 0.30             | 17.75 | <i>NNO1</i> |
| rs2361065  | 11  | 7857944  | G  | 0.84 | 0.00432               | 0.41             | 0     | <i>NNO1</i> |
| rs4237704  | 11  | 12198606 | A  | 0.87 | 0.00452               | 0.92             | 0     | <i>NNO1</i> |
| rs16911799 | 11  | 12907129 | A  | 1.13 | 0.00474               | 0.68             | 0     | <i>NNO1</i> |
| rs988189   | 11  | 12122809 | A  | 1.14 | 0.00486               | 0.88             | 0     | <i>NNO1</i> |
| rs10765931 | 11  | 12218676 | G  | 0.80 | 0.00498               | 0.51             | 0     | <i>NNO1</i> |
| rs7122659  | 11  | 44605698 | A  | 0.85 | 0.00528               | 0.46             | 0     | <i>NNO1</i> |
| rs366590   | 11  | 16829016 | A  | 1.14 | 0.00547               | 0.83             | 0     | <i>NNO1</i> |
| rs1459826  | 11  | 7702928  | G  | 1.12 | 0.00548               | 0.92             | 0     | <i>NNO1</i> |
| rs4420242  | 11  | 12940628 | C  | 1.13 | 0.00552               | 0.58             | 0     | <i>NNO1</i> |

|            |    |           |   |      |         |      |       |      |
|------------|----|-----------|---|------|---------|------|-------|------|
| rs11822631 | 11 | 2577110   | C | 1.15 | 0.00556 | 0.36 | 8.94  | NNO1 |
| rs11038993 | 11 | 46767492  | A | 0.87 | 0.00557 | 0.77 | 0     | NNO1 |
| rs224612   | 11 | 32019805  | A | 0.84 | 0.00572 | 0.80 | 0     | NNO1 |
| rs11025878 | 11 | 20998335  | A | 1.22 | 0.00577 | 0.85 | 0     | NNO1 |
| rs1478762  | 11 | 37901485  | A | 1.12 | 0.00578 | 0.93 | 0     | NNO1 |
| rs1493955  | 11 | 12212874  | A | 0.81 | 0.00610 | 0.84 | 0     | NNO1 |
| rs1487721  | 11 | 45131106  | A | 1.13 | 0.00618 | 0.96 | 0     | NNO1 |
| rs1389455  | 11 | 26604761  | A | 0.85 | 0.00653 | 0.90 | 0     | NNO1 |
| rs1330     | 11 | 17272605  | A | 1.13 | 0.00655 | 0.35 | 10.47 | NNO1 |
| rs7481099  | 11 | 11460104  | A | 1.12 | 0.00675 | 0.85 | 0     | NNO1 |
| rs10833809 | 11 | 22741425  | A | 1.12 | 0.00689 | 0.60 | 0     | NNO1 |
| rs4469873  | 11 | 12925354  | A | 1.12 | 0.00699 | 0.57 | 0     | NNO1 |
| rs7937953  | 11 | 12935831  | A | 1.12 | 0.00716 | 0.56 | 0     | NNO1 |
| rs7932167  | 11 | 610599    | C | 0.89 | 0.00765 | 0.51 | 0     | NNO1 |
| rs10501045 | 11 | 26300143  | A | 0.87 | 0.00770 | 0.53 | 0     | NNO1 |
| rs12799959 | 11 | 7277111   | A | 0.85 | 0.00774 | 0.93 | 0     | NNO1 |
| rs1471014  | 11 | 11697651  | G | 1.13 | 0.00780 | 0.69 | 0     | NNO1 |
| rs897360   | 11 | 11720424  | A | 1.13 | 0.00808 | 0.82 | 0     | NNO1 |
| rs11021873 | 11 | 11457483  | A | 1.13 | 0.00820 | 0.92 | 0     | NNO1 |
| rs12269906 | 11 | 10976659  | A | 1.29 | 0.00823 | 0.96 | 0     | NNO1 |
| rs890249   | 11 | 43156514  | G | 1.12 | 0.00836 | 0.77 | 0     | NNO1 |
| rs4758417  | 11 | 6416514   | G | 1.17 | 0.00848 | 0.39 | 2.19  | NNO1 |
| rs7928025  | 11 | 11450195  | A | 1.12 | 0.00902 | 0.45 | 0     | NNO1 |
| rs1503502  | 11 | 19040053  | A | 0.90 | 0.00909 | 0.95 | 0     | NNO1 |
| rs1528133  | 11 | 8106329   | C | 1.24 | 0.00911 | 0.34 | 11.99 | NNO1 |
| rs1351650  | 11 | 7703386   | A | 1.11 | 0.00933 | 0.86 | 0     | NNO1 |
| rs11039035 | 11 | 46923991  | A | 0.89 | 0.00942 | 0.64 | 0     | NNO1 |
| rs12417519 | 11 | 47085973  | G | 0.89 | 0.00955 | 0.45 | 0     | NNO1 |
| rs193276   | 11 | 35140414  | G | 0.86 | 0.00966 | 0.49 | 0     | NNO1 |
| rs7950535  | 11 | 32504854  | G | 0.67 | 0.00973 | 0.92 | 0     | NNO1 |
| rs87603    | 11 | 35007815  | G | 1.22 | 0.00988 | 0.48 | 0     | NNO1 |
| rs1600970  | 11 | 7711535   | A | 1.11 | 0.00991 | 0.77 | 0     | NNO1 |
| rs4755794  | 11 | 44224233  | A | 0.87 | 0.00996 | 0.91 | 0     | NNO1 |
| rs10210418 | 2  | 118209547 | A | 0.87 | 0.00063 | 0.82 | 0     | NNO3 |
| rs6717729  | 2  | 99123373  | A | 0.83 | 0.00096 | 0.43 | 0     | NNO3 |
| rs11692699 | 2  | 99097089  | A | 0.83 | 0.00116 | 0.50 | 0     | NNO3 |
| rs7592778  | 2  | 120903533 | A | 0.87 | 0.00131 | 0.99 | 0     | NNO3 |
| rs12463880 | 2  | 106898427 | A | 1.14 | 0.00155 | 0.49 | 0     | NNO3 |
| rs6742683  | 2  | 106933795 | A | 1.14 | 0.00198 | 0.87 | 0     | NNO3 |
| rs2139399  | 2  | 104431743 | A | 0.87 | 0.00225 | 0.90 | 0     | NNO3 |
| rs4402763  | 2  | 126317380 | G | 0.70 | 0.00225 | 0.36 | 8.11  | NNO3 |
| rs2193909  | 2  | 125926354 | A | 0.85 | 0.00246 | 0.62 | 0     | NNO3 |
| rs12464700 | 2  | 121572920 | G | 0.88 | 0.00258 | 0.93 | 0     | NNO3 |

|            |   |           |   |      |         |      |       |             |
|------------|---|-----------|---|------|---------|------|-------|-------------|
| rs10515924 | 2 | 118202634 | A | 1.14 | 0.00267 | 0.74 | 0     | <i>NN03</i> |
| rs6709558  | 2 | 121603296 | G | 0.88 | 0.00271 | 0.80 | 0     | <i>NN03</i> |
| rs779984   | 2 | 124844266 | A | 0.79 | 0.00276 | 0.88 | 0     | <i>NN03</i> |
| rs2059029  | 2 | 125901384 | A | 0.86 | 0.00334 | 0.66 | 0     | <i>NN03</i> |
| rs1436304  | 2 | 125883201 | A | 0.85 | 0.00339 | 0.77 | 0     | <i>NN03</i> |
| rs1562313  | 2 | 100953887 | A | 1.15 | 0.00344 | 0.89 | 0     | <i>NN03</i> |
| rs13033073 | 2 | 106925339 | A | 1.13 | 0.00378 | 0.70 | 0     | <i>NN03</i> |
| rs11124141 | 2 | 106939196 | G | 1.13 | 0.00384 | 0.77 | 0     | <i>NN03</i> |
| rs10202196 | 2 | 125898078 | G | 0.86 | 0.00386 | 0.69 | 0     | <i>NN03</i> |
| rs10171785 | 2 | 127406758 | G | 1.29 | 0.00405 | 0.91 | 0     | <i>NN03</i> |
| rs880713   | 2 | 128848084 | G | 1.13 | 0.00432 | 0.90 | 0     | <i>NN03</i> |
| rs7602423  | 2 | 125560858 | A | 0.86 | 0.00437 | 0.57 | 0     | <i>NN03</i> |
| rs4602234  | 2 | 125551151 | A | 0.86 | 0.00458 | 0.62 | 0     | <i>NN03</i> |
| rs1820556  | 2 | 126006846 | C | 0.86 | 0.00458 | 0.61 | 0     | <i>NN03</i> |
| rs2084869  | 2 | 125996477 | A | 0.86 | 0.00462 | 0.61 | 0     | <i>NN03</i> |
| rs6749443  | 2 | 104451572 | G | 0.89 | 0.00476 | 0.93 | 0     | <i>NN03</i> |
| rs7572049  | 2 | 125536864 | A | 0.86 | 0.00479 | 0.61 | 0     | <i>NN03</i> |
| rs908634   | 2 | 121615878 | G | 0.89 | 0.00507 | 0.79 | 0     | <i>NN03</i> |
| rs6542775  | 2 | 108679550 | A | 1.22 | 0.00539 | 0.49 | 0     | <i>NN03</i> |
| rs10192557 | 2 | 125534152 | G | 0.86 | 0.00580 | 0.62 | 0     | <i>NN03</i> |
| rs9789595  | 2 | 106905733 | G | 1.12 | 0.00626 | 0.73 | 0     | <i>NN03</i> |
| rs7571787  | 2 | 121584893 | A | 0.89 | 0.00639 | 0.96 | 0     | <i>NN03</i> |
| rs17030964 | 2 | 105460819 | A | 1.19 | 0.00658 | 0.93 | 0     | <i>NN03</i> |
| rs6742893  | 2 | 118192890 | G | 1.12 | 0.00659 | 0.60 | 0     | <i>NN03</i> |
| rs840887   | 2 | 128775685 | A | 1.14 | 0.00675 | 0.59 | 0     | <i>NN03</i> |
| rs12477316 | 2 | 118201160 | A | 0.89 | 0.00677 | 0.79 | 0     | <i>NN03</i> |
| rs4491733  | 2 | 119434498 | A | 1.12 | 0.00738 | 0.48 | 0     | <i>NN03</i> |
| rs383993   | 2 | 109041343 | A | 1.15 | 0.00739 | 0.83 | 0     | <i>NN03</i> |
| rs6739515  | 2 | 125740708 | A | 0.85 | 0.00751 | 0.92 | 0     | <i>NN03</i> |
| rs11885558 | 2 | 121617596 | A | 0.89 | 0.00766 | 0.66 | 0     | <i>NN03</i> |
| rs10169502 | 2 | 121600216 | G | 0.89 | 0.00780 | 0.79 | 0     | <i>NN03</i> |
| rs7568838  | 2 | 108549026 | G | 1.21 | 0.00790 | 0.48 | 0     | <i>NN03</i> |
| rs12624214 | 2 | 124348173 | A | 1.25 | 0.00820 | 0.34 | 11.08 | <i>NN03</i> |
| rs9308661  | 2 | 125909964 | G | 0.87 | 0.00834 | 0.67 | 0     | <i>NN03</i> |
| rs2610225  | 2 | 125681338 | G | 0.87 | 0.00880 | 0.59 | 0     | <i>NN03</i> |
| rs2059030  | 2 | 125901493 | A | 0.87 | 0.00890 | 0.40 | 0.75  | <i>NN03</i> |
| rs8179791  | 2 | 128773387 | A | 1.13 | 0.00891 | 0.57 | 0     | <i>NN03</i> |
| rs2193910  | 2 | 125933823 | A | 0.85 | 0.00926 | 0.36 | 7.69  | <i>NN03</i> |
| rs2138814  | 2 | 121594078 | A | 1.12 | 0.00933 | 0.71 | 0     | <i>NN03</i> |
| rs6710520  | 2 | 126004530 | A | 0.86 | 0.00966 | 0.60 | 0     | <i>NN03</i> |

A1: minor allele. OR: Per-allele odds ratio. *P*: *P*-value for association.  $P_{\text{het}}$ : Heterogeneity *P*-value across the 5 Stage 1 sample collections.  $I^2$ :  $I^2$  index for heterogeneity.

## Supplementary Table 8

Study power as a function of disease allele frequency and per-allele odds ratio for

(a) the double staged study at  $P < 5 \times 10^{-8}$  and (b) statistical power to detect SNPs at  $P < 10^{-5}$  in Stage 1.

(a)

| Risk allele frequency | Per-allele odds ratio |        |        |        |        |        |        |
|-----------------------|-----------------------|--------|--------|--------|--------|--------|--------|
|                       | 1.20                  | 1.25   | 1.30   | 1.35   | 1.40   | 1.50   | 1.60   |
| 0.10                  | 21.0%                 | 62.2%  | 92.1%  | >99.9% | >99.9% | >99.9% | >99.9% |
| 0.15                  | 51.4%                 | 91.0%  | >99.9% | >99.9% | >99.9% | >99.9% | >99.9% |
| 0.20                  | 74.0%                 | 98.1%  | >99.9% | >99.9% | >99.9% | >99.9% | >99.9% |
| 0.25                  | 86.3%                 | >99.9% | >99.9% | >99.9% | >99.9% | >99.9% | >99.9% |
| 0.30                  | 92.3%                 | >99.9% | >99.9% | >99.9% | >99.9% | >99.9% | >99.9% |
| 0.35                  | 95.0%                 | >99.9% | >99.9% | >99.9% | >99.9% | >99.9% | >99.9% |

These power calculations are based on a GWAS and replication (double staged) study design whereby SNPs showing  $P$ -values  $< 10^{-5}$  in Stage 1 (1,854 cases and 9,608 controls) is brought forward for replication in the 6 independent PACG disease collections comprising Stage 2 (1,917 cases and 8,943 controls). The power calculation is based on final meta-analysis to detect SNPs at genome-wide significance ( $P < 5 \times 10^{-8}$ ), as previously described<sup>14-15</sup>. Shaded areas represent > 90 percent statistical power for detection.



(b)

| Risk allele frequency | Per-allele odds ratio |       |       |        |        |        |        |
|-----------------------|-----------------------|-------|-------|--------|--------|--------|--------|
|                       | 1.20                  | 1.25  | 1.30  | 1.35   | 1.40   | 1.50   | 1.60   |
| 0.10                  | 12.6%                 | 36.1% | 66.2% | 88.1%  | 97.3%  | >99.9% | >99.9% |
| 0.15                  | 29.0%                 | 64.3% | 89.8% | 98.4%  | 99.9%  | >99.9% | >99.9% |
| 0.20                  | 45.1%                 | 81.3% | 97.0% | 99.8%  | >99.9% | >99.9% | >99.9% |
| 0.25                  | 57.7%                 | 89.8% | 99.0% | >99.9% | >99.9% | >99.9% | >99.9% |
| 0.30                  | 66.4%                 | 93.9% | 99.6% | >99.9% | >99.9% | >99.9% | >99.9% |
| 0.35                  | 72.0%                 | 95.8% | 99.8% | >99.9% | >99.9% | >99.9% | >99.9% |

These power calculations are based on the ability of the Stage 1 study to detect SNPs at  $P$ -values  $< 10^{-5}$ . Shaded areas represent  $> 90$  percent statistical power for detection.

## Supplementary Table 9

Gene specific primer sequences for RT-PCR analysis.

| Primer ID        | Sequences                     | Amplicon Size (bp) | Annealing Temp (°C) |
|------------------|-------------------------------|--------------------|---------------------|
| <i>PLEKHA7-F</i> | 5' TAAAGACAGCCGAGAAGAAG 3'    | 206                | 58                  |
| <i>PLEKHA7-R</i> | 5' TGTCGGCACTGAAGTAGTAG 3'    |                    |                     |
| <i>COL11A1-F</i> | 5' GCAGGGAGAGATGGAGTTCAAGG 3' | 242                | 58                  |
| <i>COL11A1-R</i> | 5' TGCCCAAACATCCCCTGCTG 3'    |                    |                     |
| <i>PCMTD1-F</i>  | 5' ACACAGATTATGCGAACTGG 3'    | 166                | 58                  |
| <i>PCMTD1-R</i>  | 5' TGTAATACGAGCCAAGTCC 3'     |                    |                     |
| <i>ST18-F</i>    | 5' AGGGTAGAGAAGGCAGGACGG 3'   | 223                | 58                  |
| <i>ST18-R</i>    | 5' AGGTCTCTTCCACATCGCCCC 3'   |                    |                     |
| <i>ACTB-F</i>    | 5' CCAACCGCGAGAAGATGA 3'      | 97                 | 58                  |
| <i>ACTB-R</i>    | 5' CCAGAGGCGTACAGGGATAG 3'    |                    |                     |

## Supplementary Figure 1

(a) Principal component analysis between PACG cases and healthy controls for the Singaporean Chinese PACG collection. The vast majority of cases have genetically matched controls. Additional statistical correction for the top principal components using logistic regression was conducted to minimize residual population stratification.

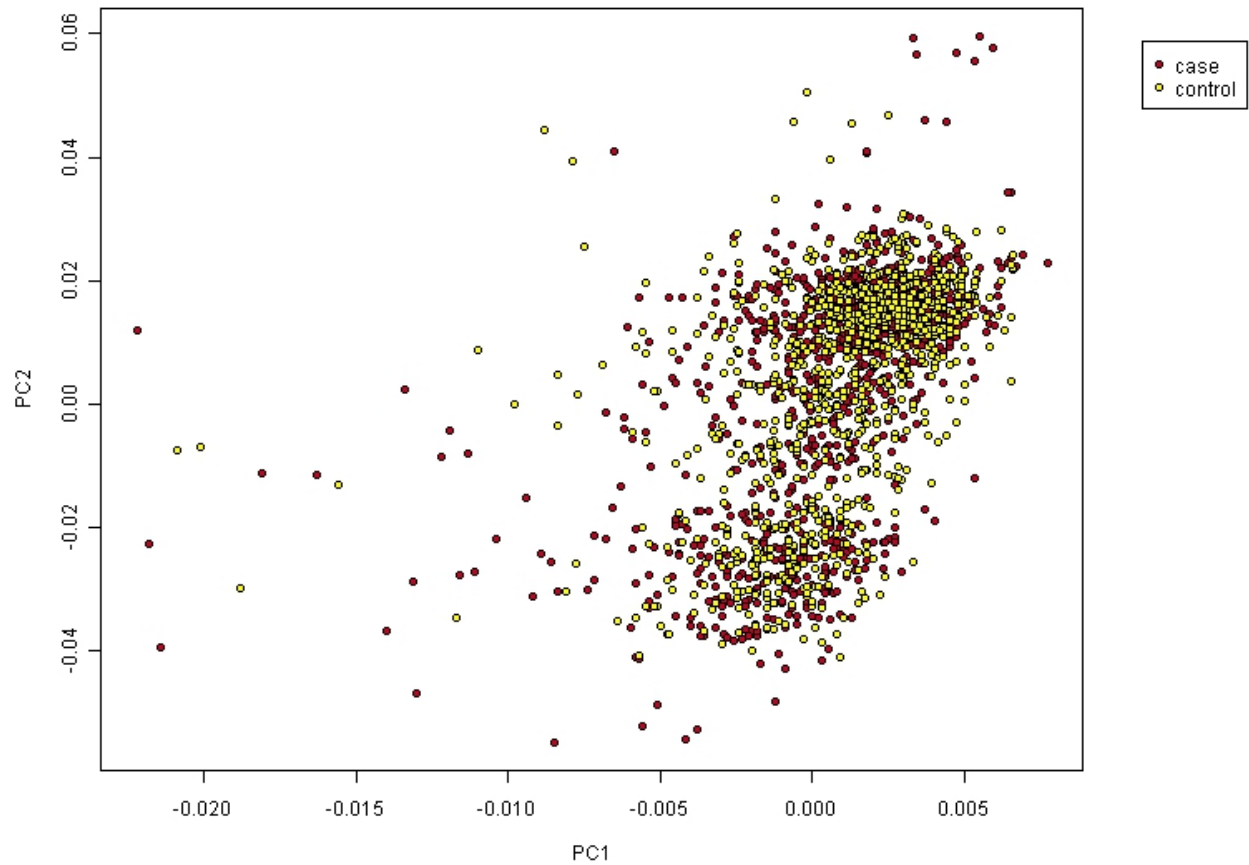

Lambda = 1.04

(b) Principal component analysis between PACG cases and healthy controls for the Hong Kong collection. The vast majority of cases have genetically matched controls. Additional statistical correction for the top principal components using logistic regression was conducted to minimize residual population stratification.

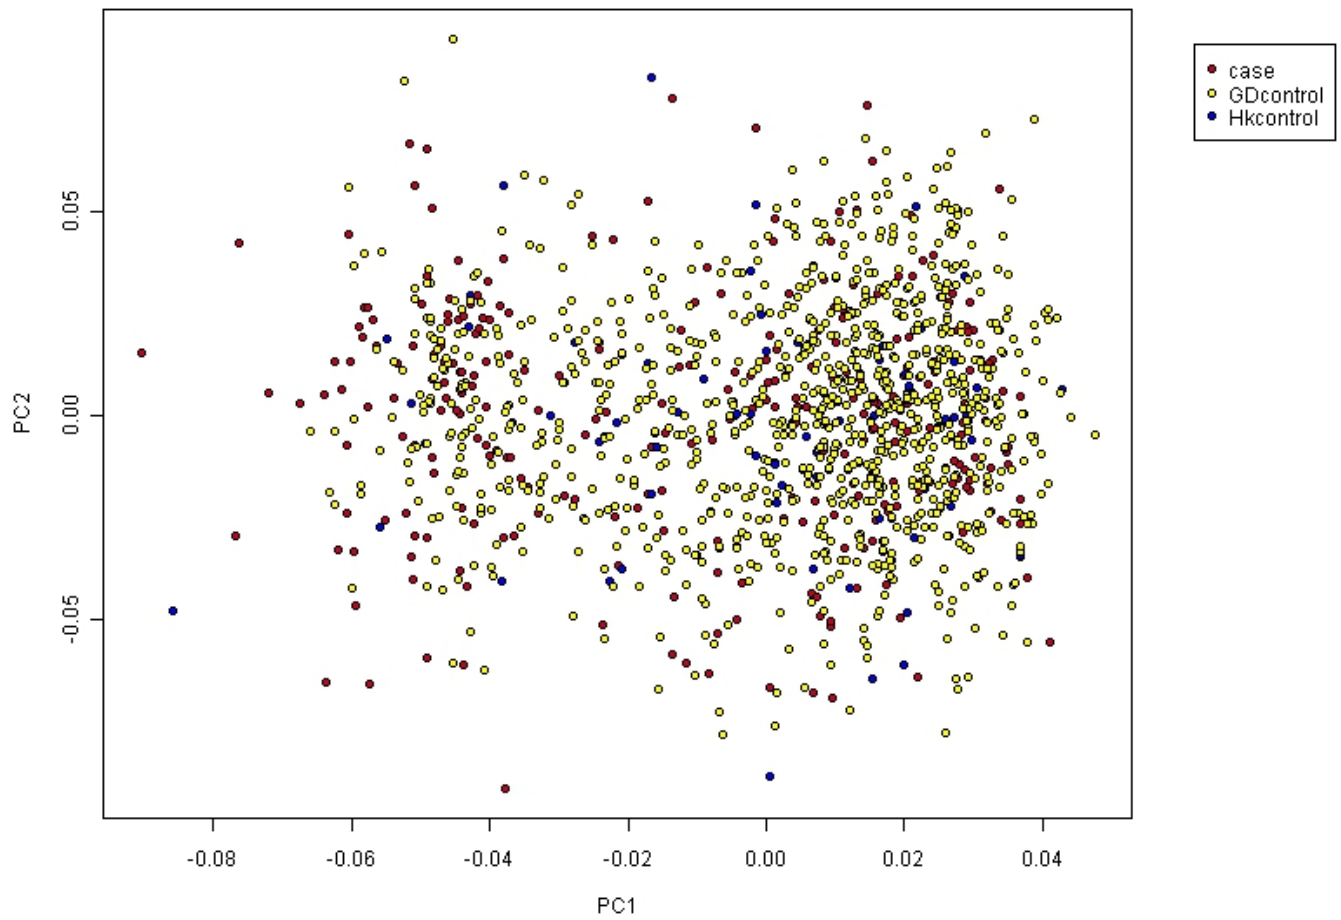

Lambda = 1.01

(c) Principal component analysis between PACG cases and healthy controls for the Indian PACG collection. The vast majority of cases have genetically matched controls. Additional statistical correction for the top principal components using logistic regression was conducted to minimize residual population stratification.

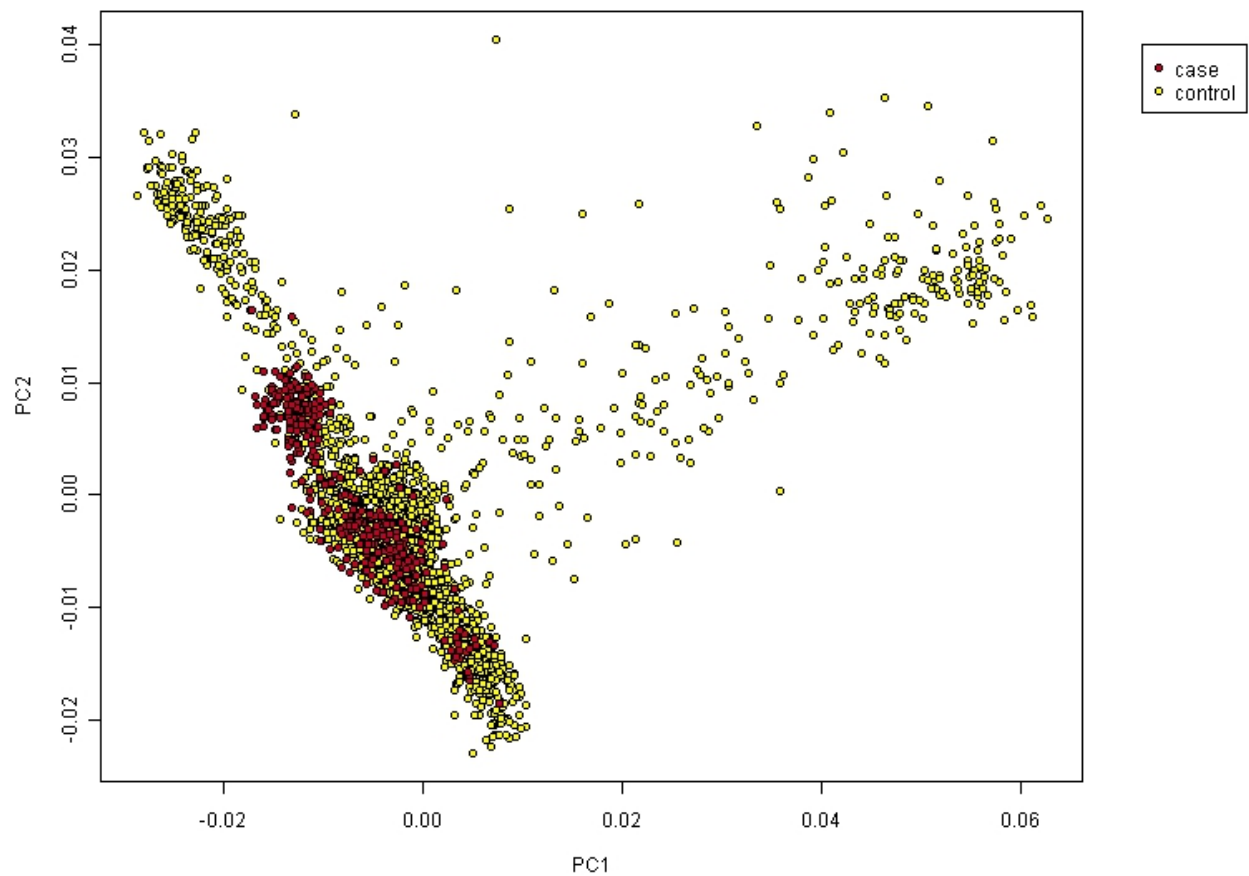

Lambda = 1.13

(d) Principal component analysis between PACG cases and healthy controls for the Malay PACG collection. The vast majority of cases have genetically matched controls. Additional statistical correction for the top principal components using logistic regression was conducted to minimize residual population stratification.

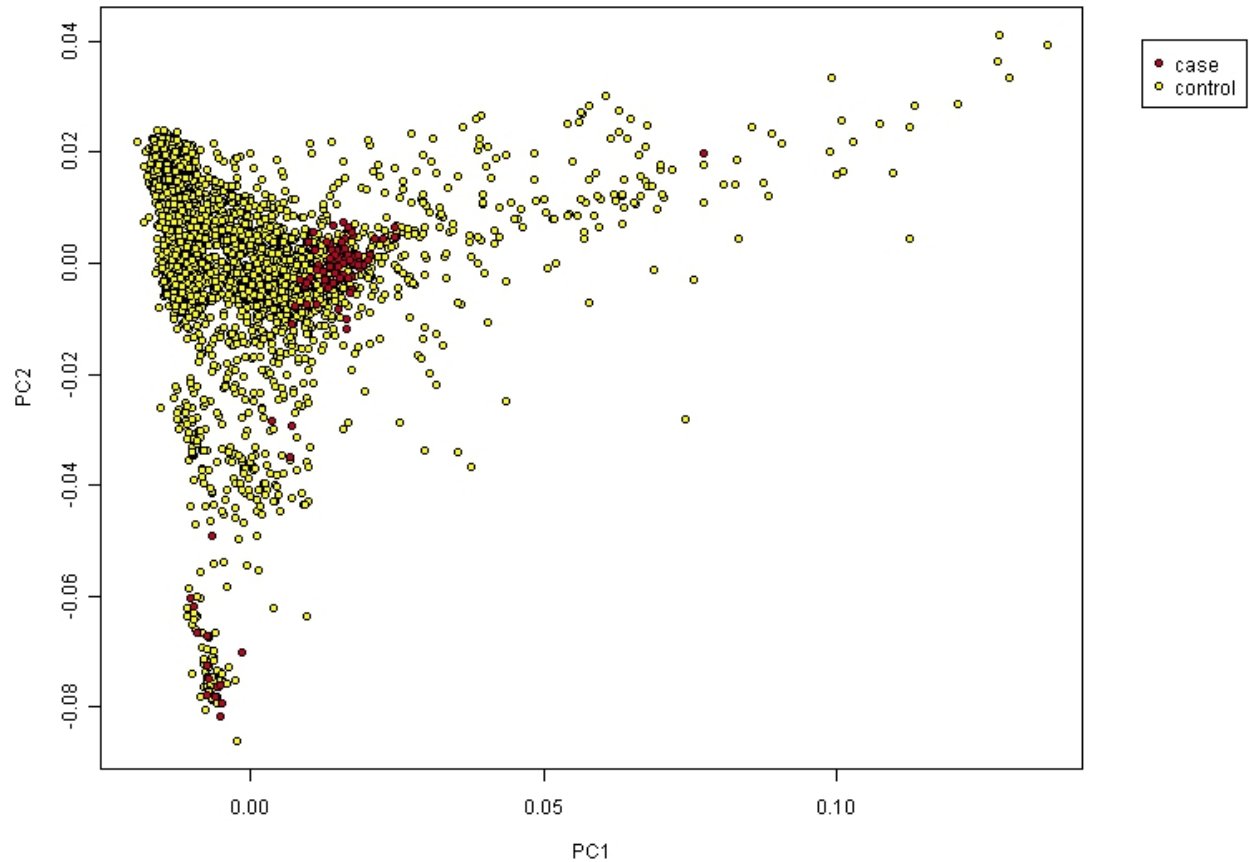

Lambda = 0.90

(e) Principal component analysis between PACG cases and healthy controls for the Vietnamese PACG collection. The vast majority of cases have genetically matched controls. Additional statistical correction for the top principal components using logistic regression was conducted to minimize residual population stratification.

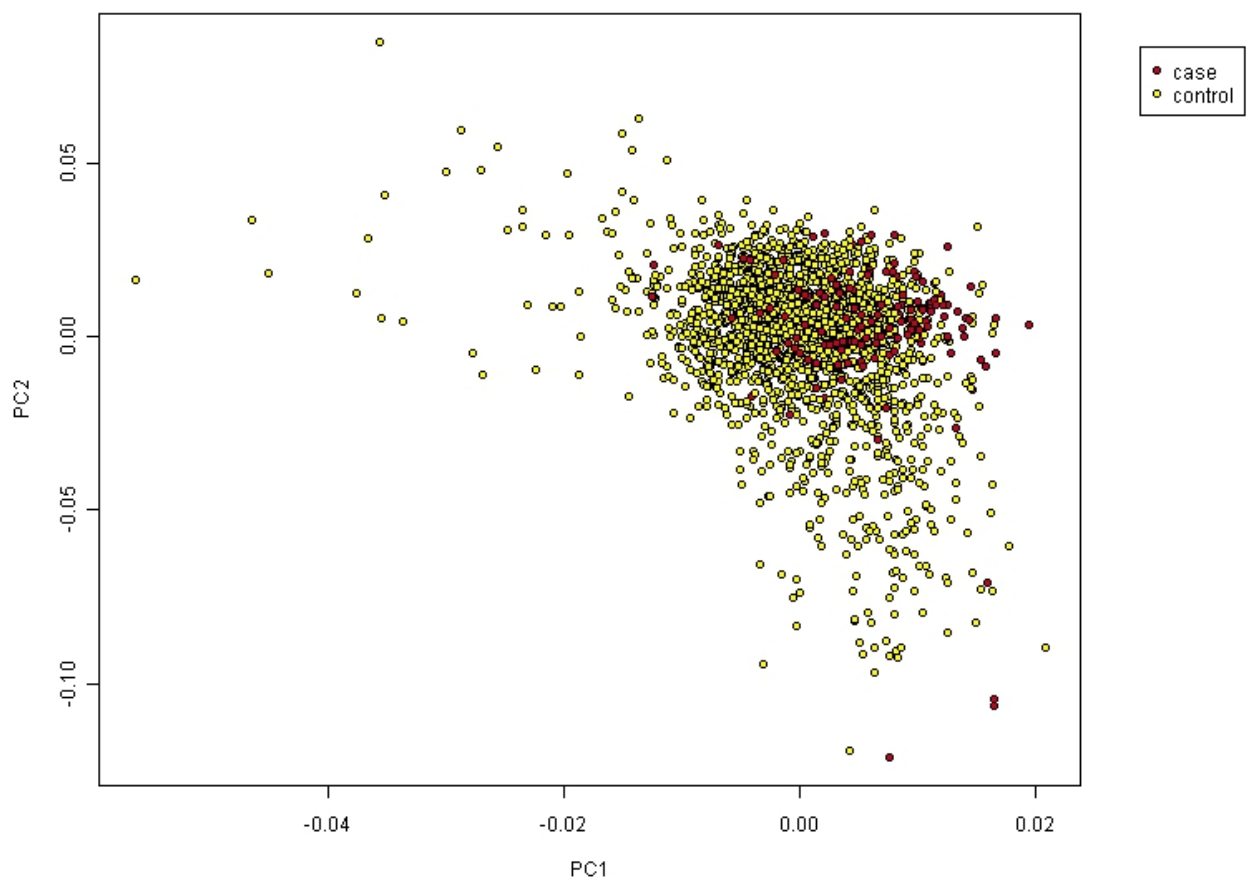

Lambda = 0.95

## Supplementary Figure 2

Forest plots showing evidence of association between genome-wide significant SNPs; (a) *PLEKHA7* rs11024102, (b) *COL11A1* rs3753841, and (c) *PCMTD1 - ST18* rs1015213. The vertical line represents a per-allele odds ratio of 1.00. The oblongs represent point estimates (referring to the per-allele odds ratio), with the height of the oblongs inversely proportional to the standard error of the point estimates. Horizontal lines indicate the 95% confidence interval for each point estimate. Meta-analysis of stages 1 and 2 are reflected by blue diamonds, and meta-analysis from all sample collections reflected by purple diamonds. The width of the diamonds indicates their 95% confidence intervals. The number in brackets before each sample collection denotes (minor allele frequency in PACG cases / minor allele frequency in controls).



(a)

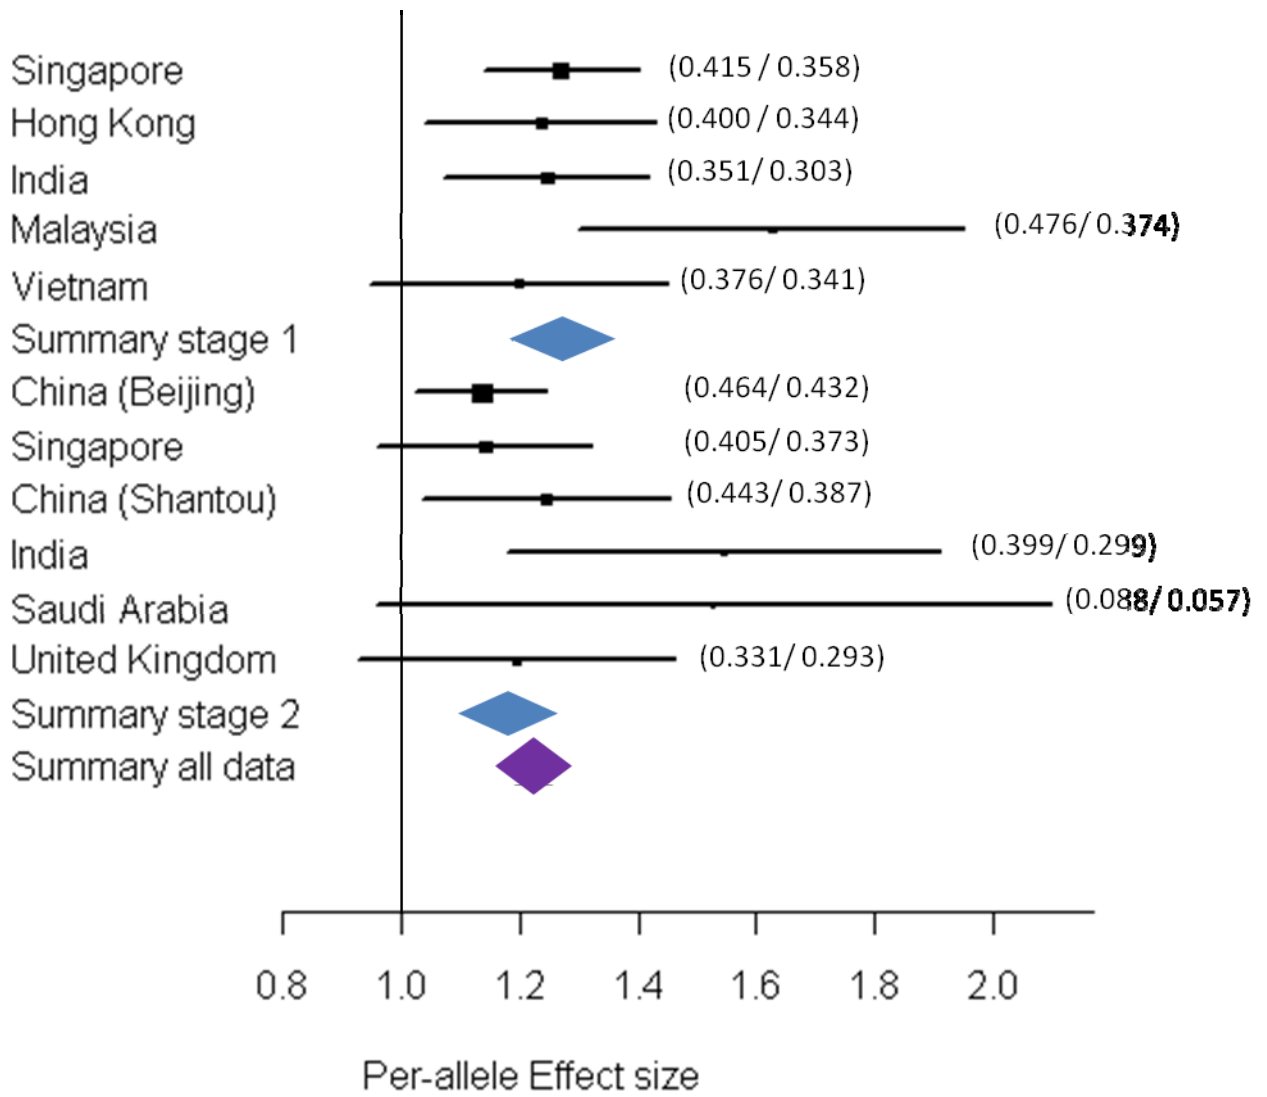

(b)

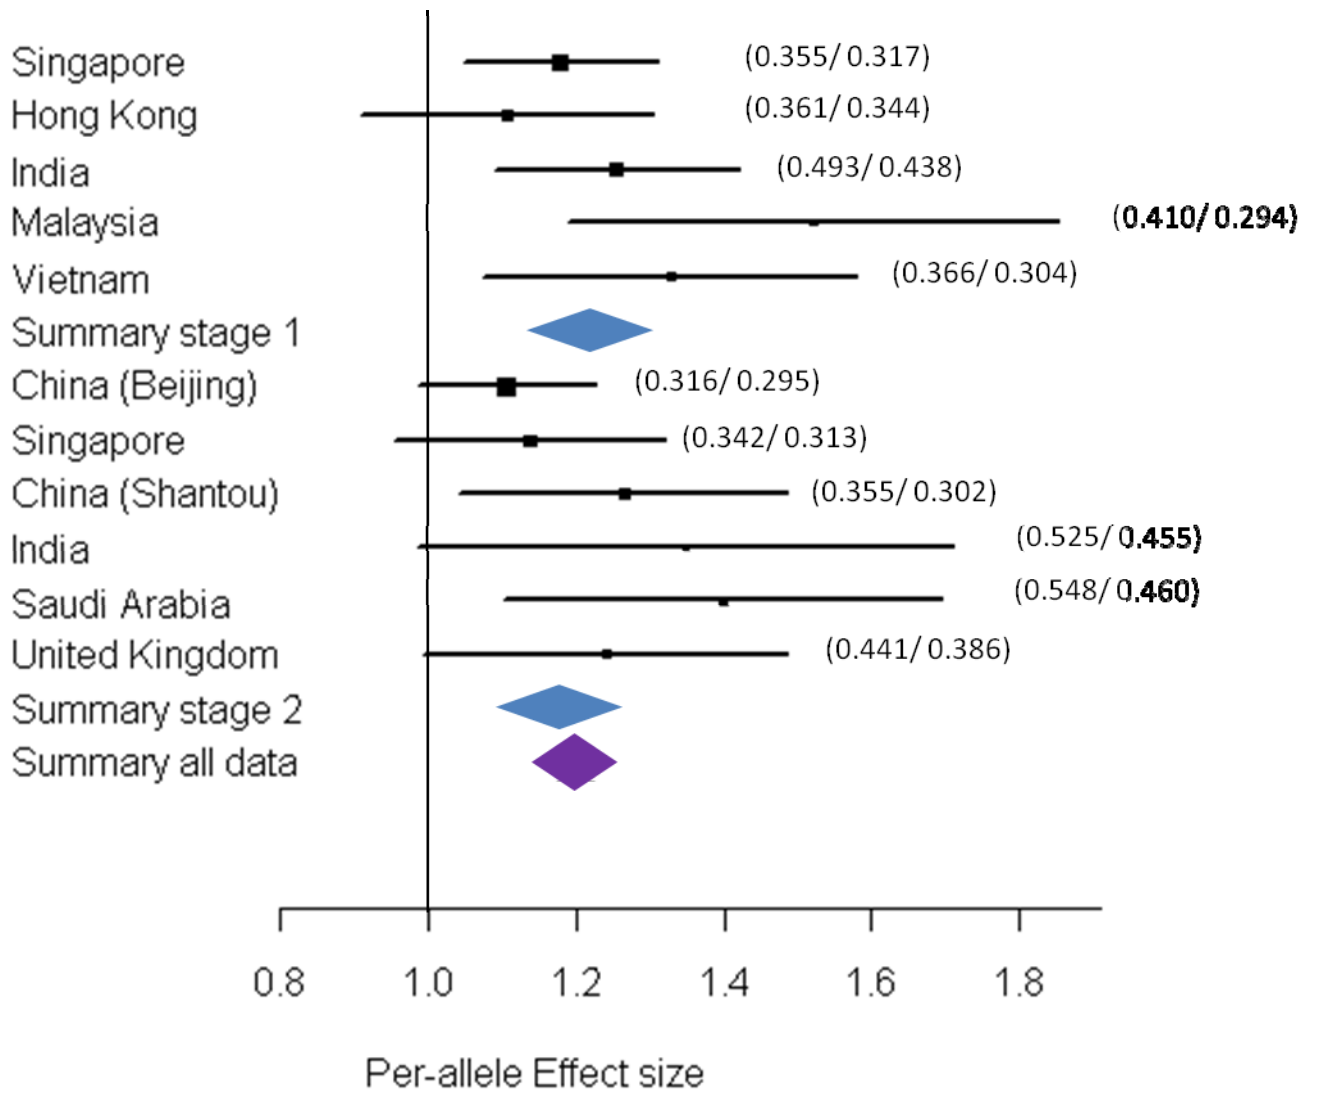

(c)

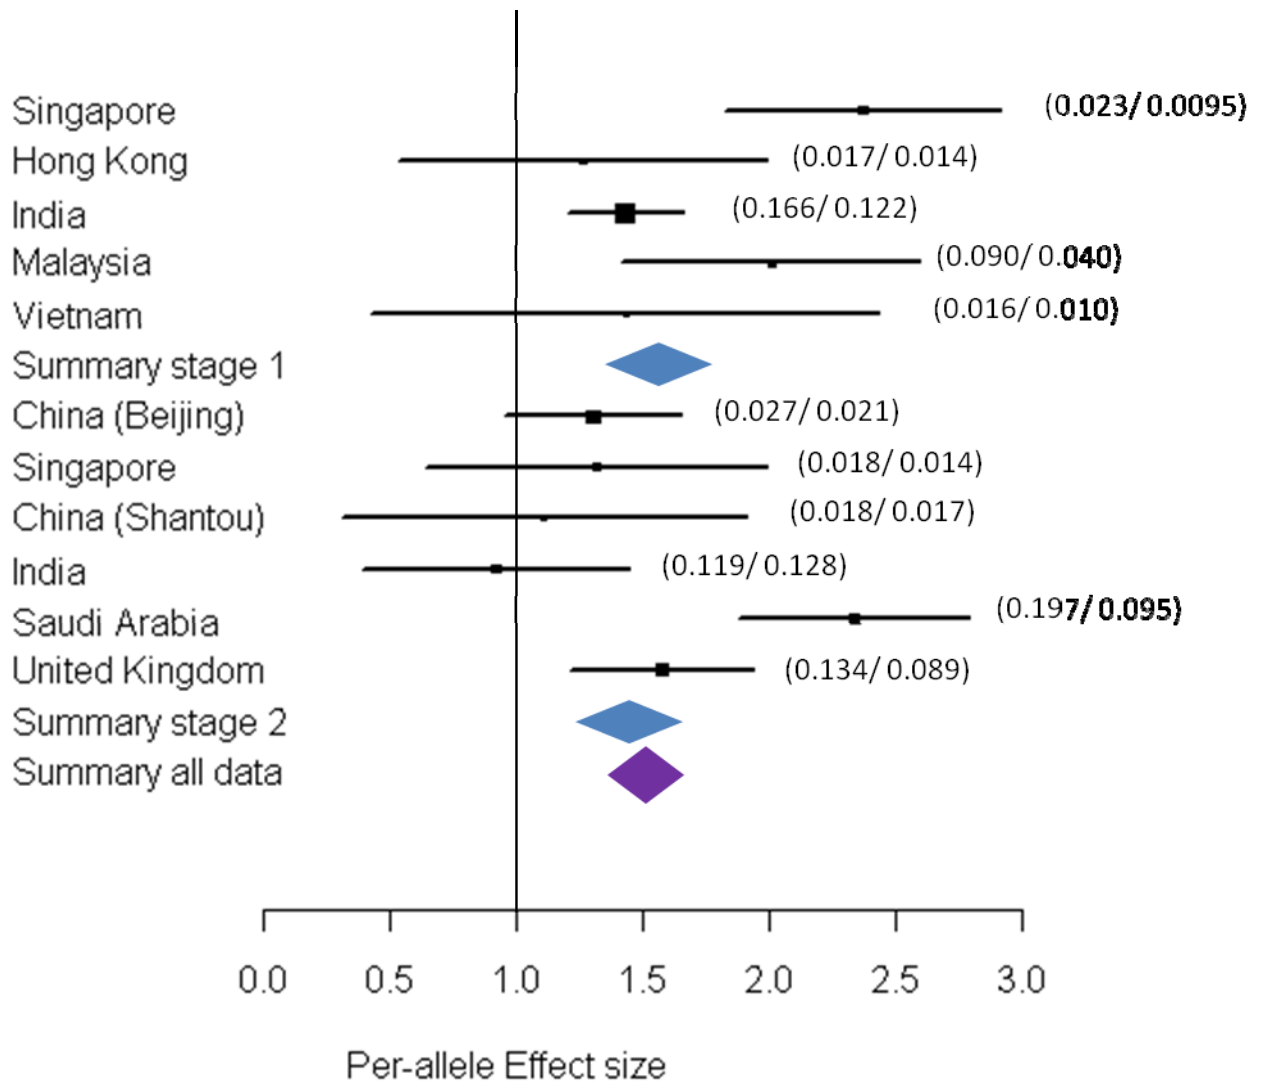

### Supplementary Figure 3

Expression analysis of *PLEKHA7*, *COL11A1*, *PCMTD1* and *ST18* in human ocular tissues. Gene specific RT-PCR products, confirmed to be so through re-sequencing, were observed differentially in anterior sclera (AS), posterior sclera (PS), cornea (corneal epithelium, CE; stroma, CS; and endothelium, CEn), iris (I), trabecular meshwork (TM), lens (L), lens capsule (LC), retina and retinal pigment epithelium (R), choroid (CRD), optic nerve head (ONH) and optic nerve (ON). The ubiquitously expressed gene, *ACTB* was used as the normalizing control. A no template sample acted as the negative control (NC) to ensure non-contamination of the RT-PCR reaction mix. M denotes molecular-weight marker.

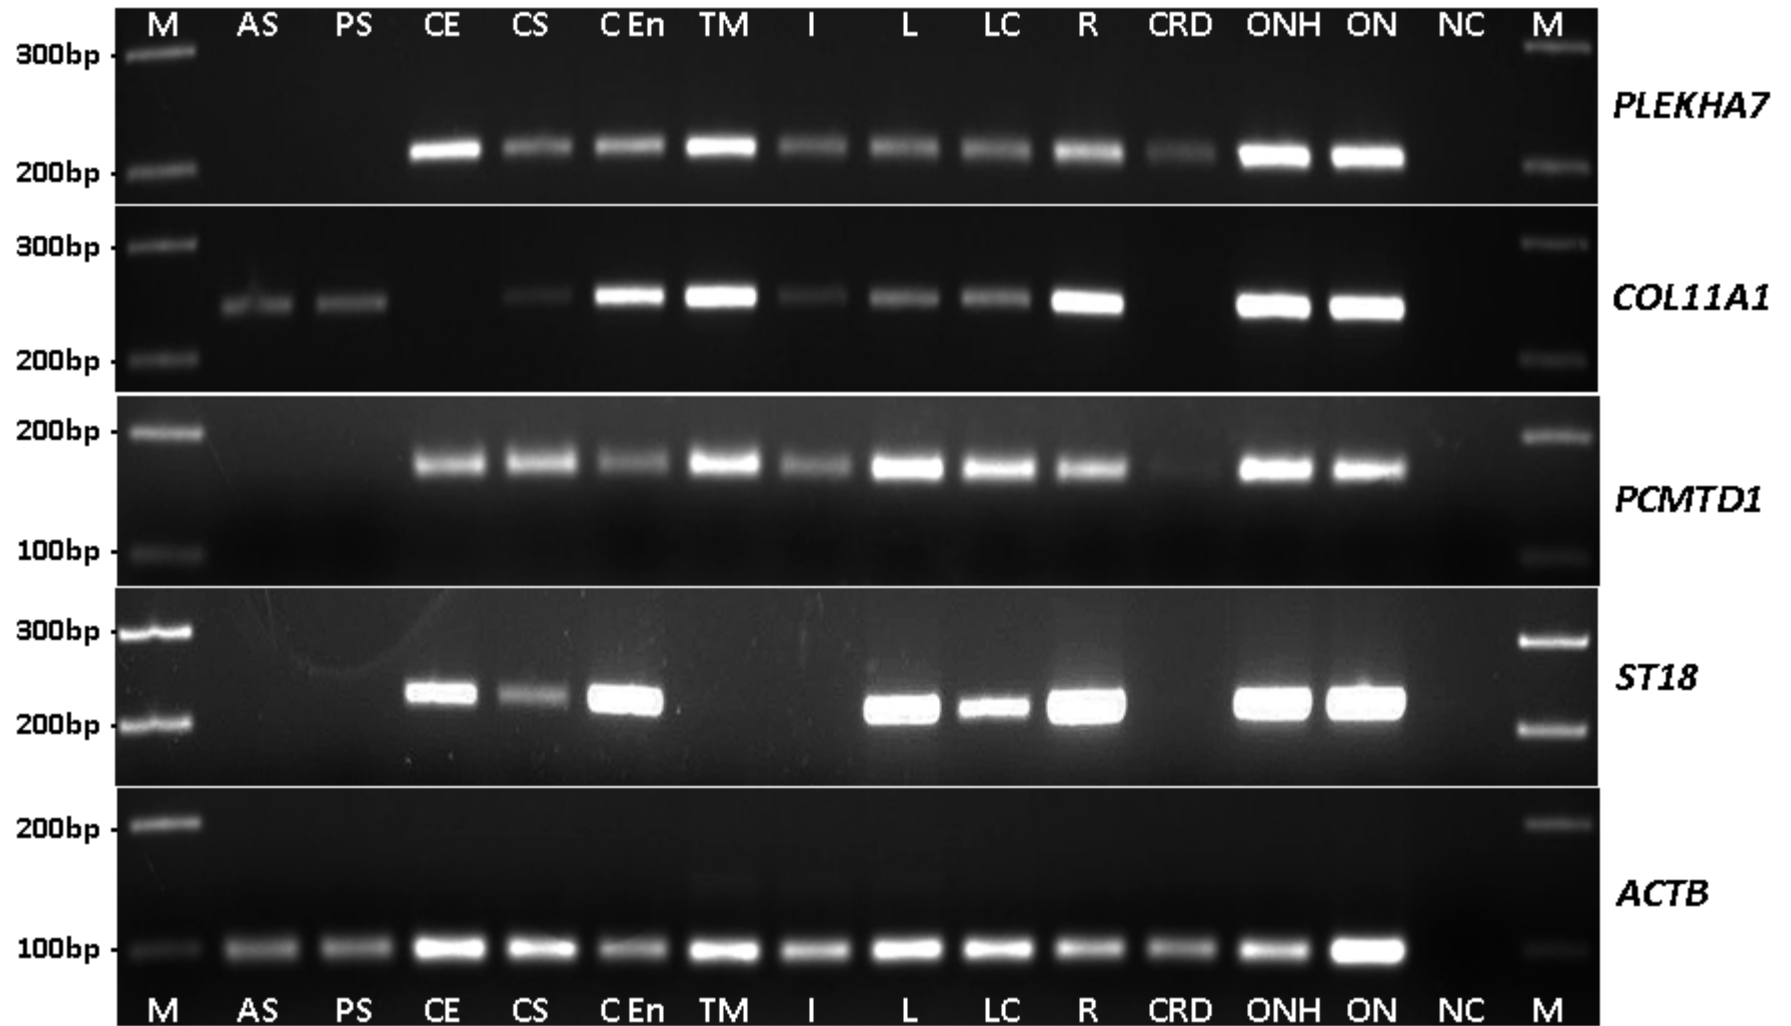

#### Supplementary Figure 4

Stage 1 data showing regional association (upper panel) and linkage disequilibrium (LD; lower panel) plots of the (a) *PLEKHA7* locus around rs11024102, (b) *COL11A1* locus around rs3753841, and (c) Chromosome 8q locus around rs1015213. Gene annotations are superimposed. The vertical axis represents  $-\text{Log}_{10}P$ -values for association with PACG in Stage 1, and the horizontal axis represents base-pair positions along the chromosome. Pair-wise LD is shown for each Stage 1 sample collection.

(a)

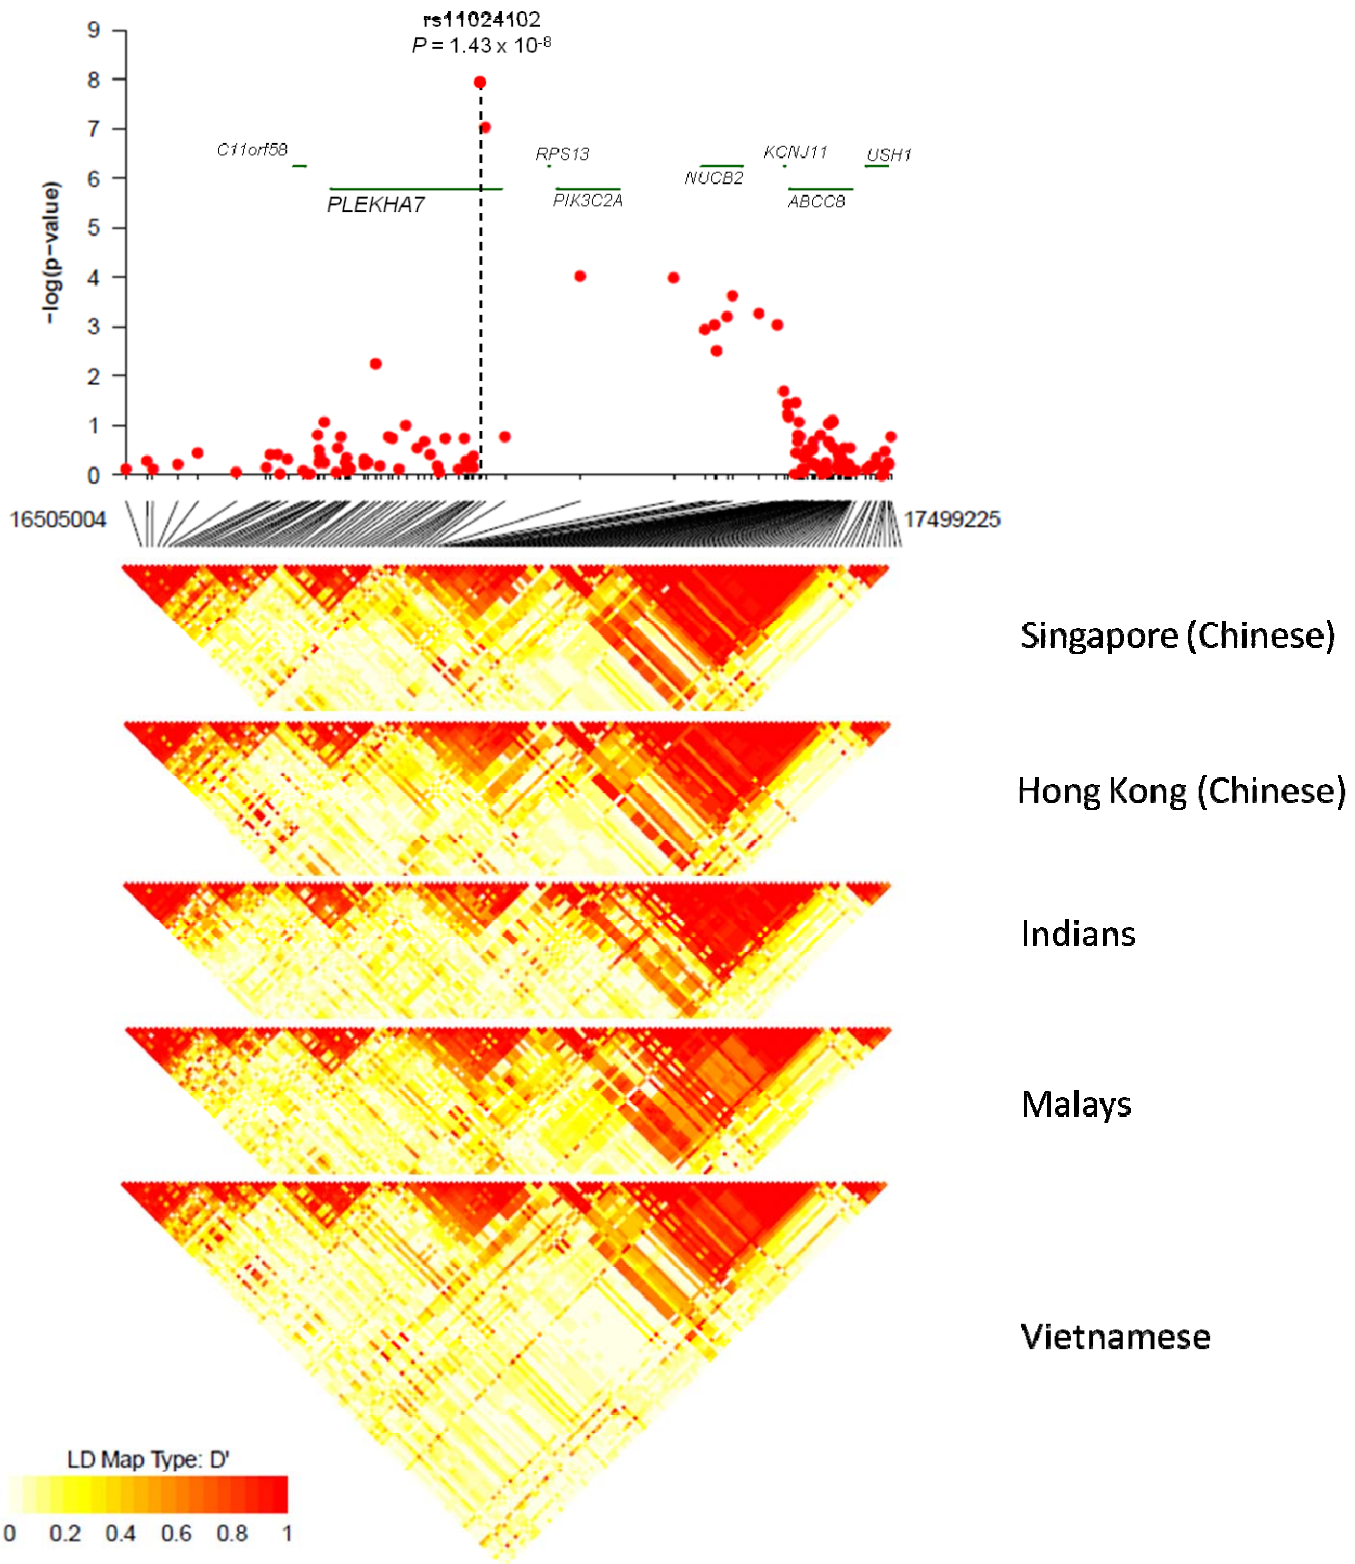

(b)

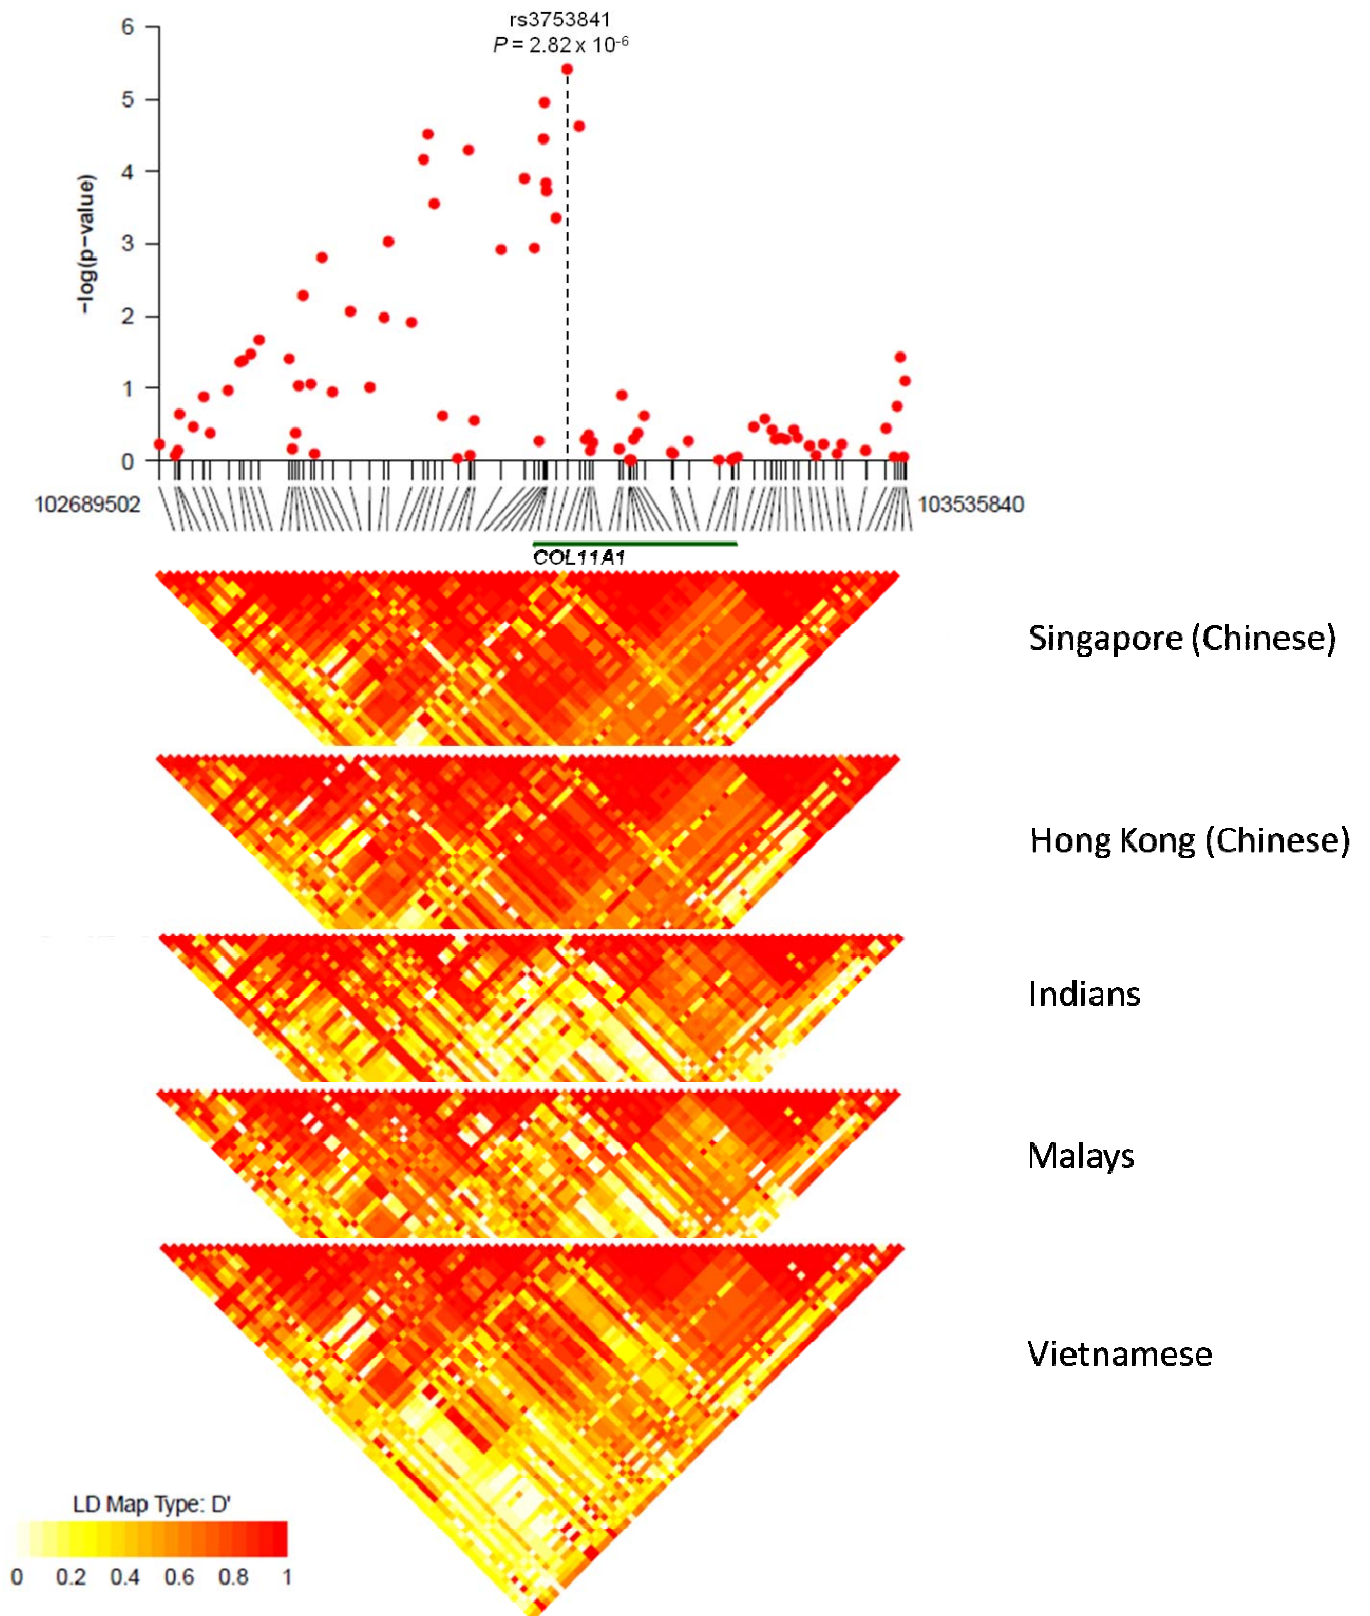



(c)

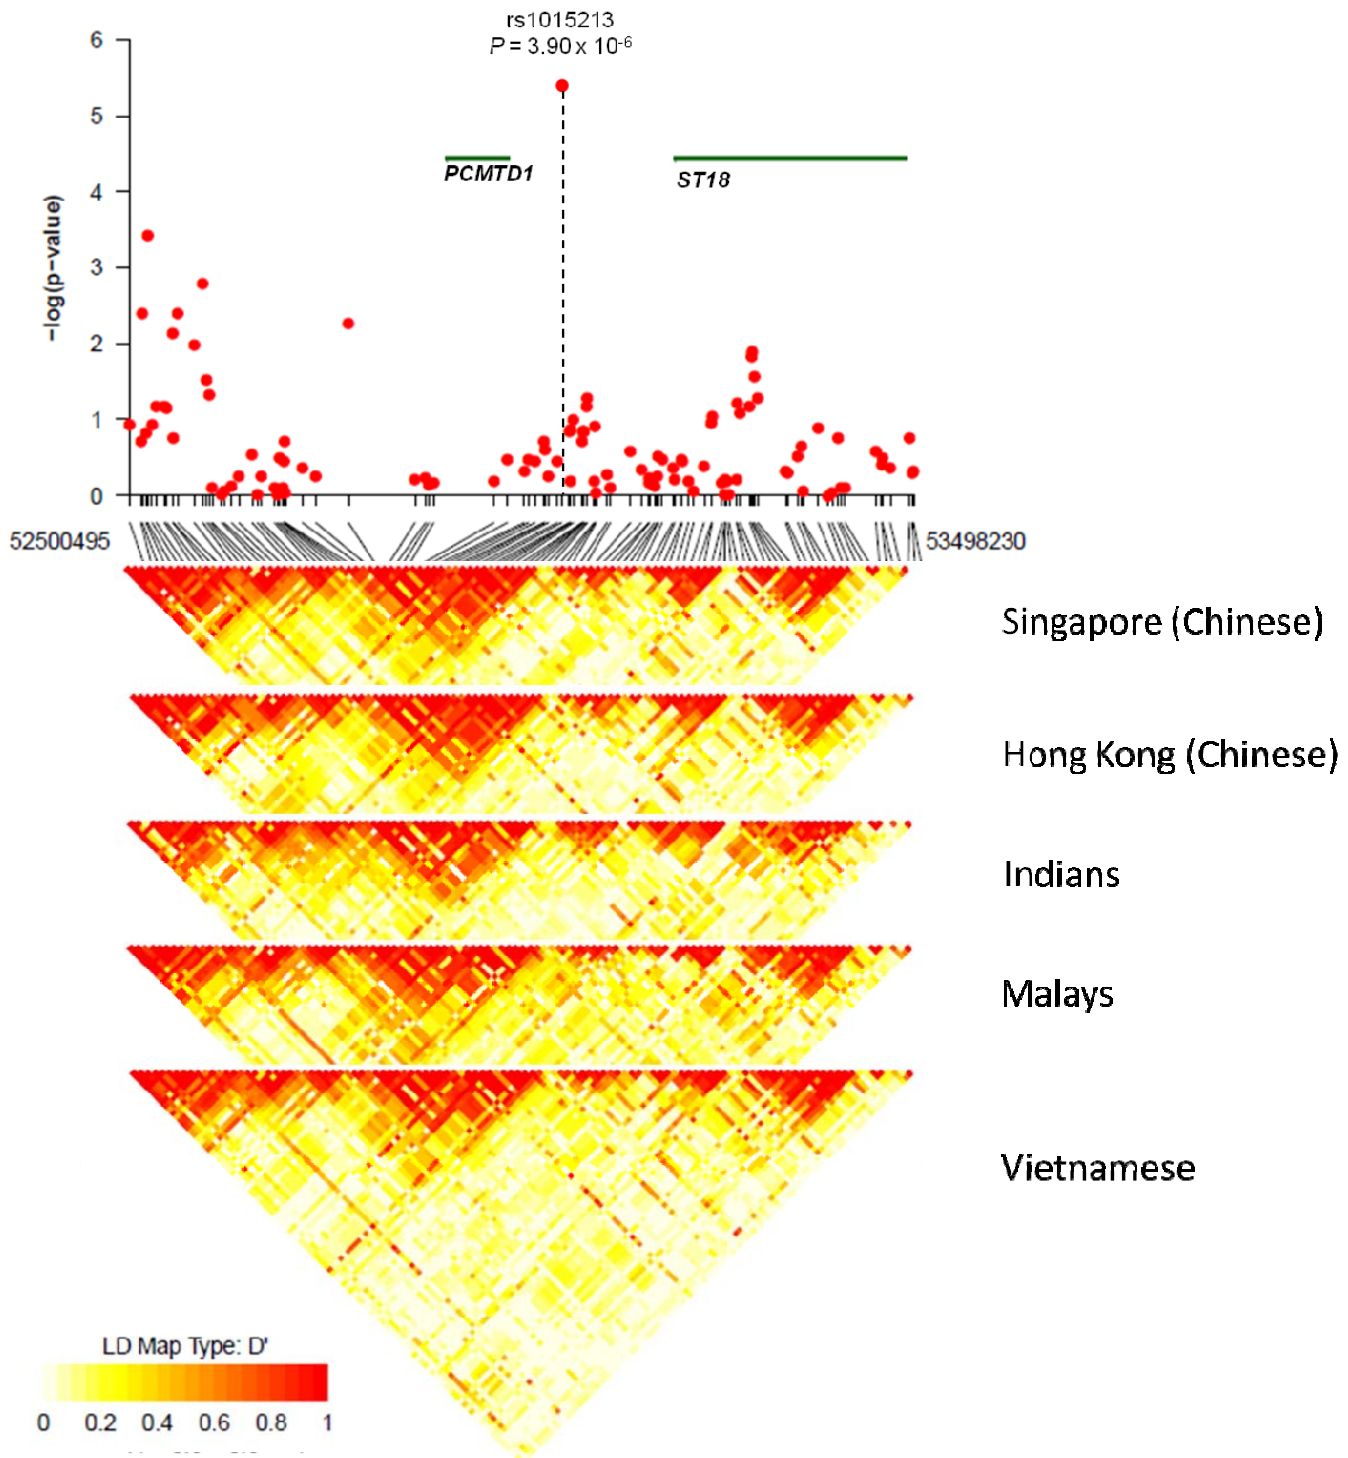

## Supplementary Figure 5a

Illumina genotyping cluster plots for the three genome-wide significant SNPs in Stage 1

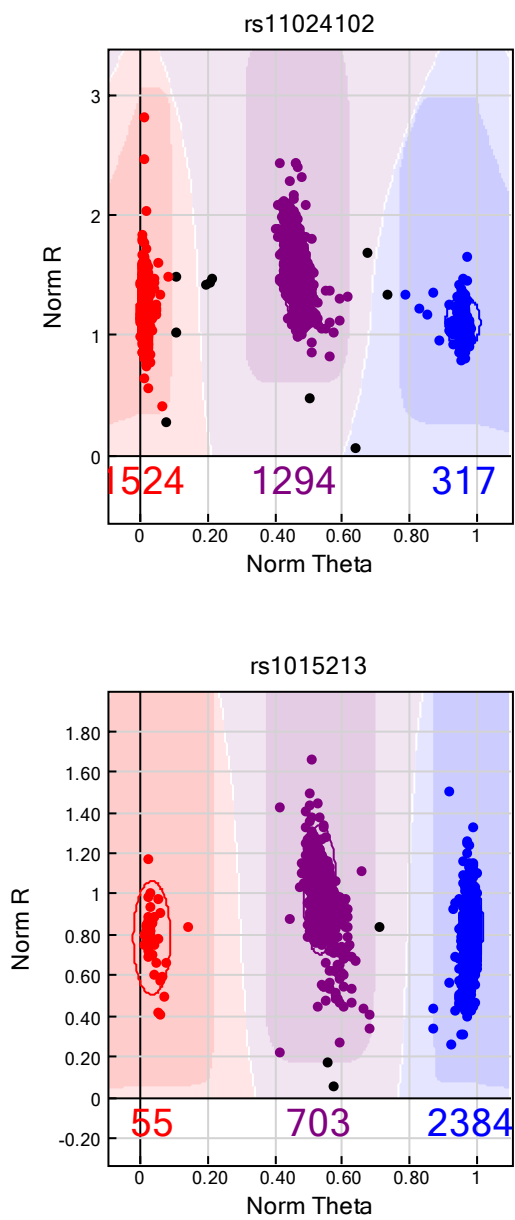

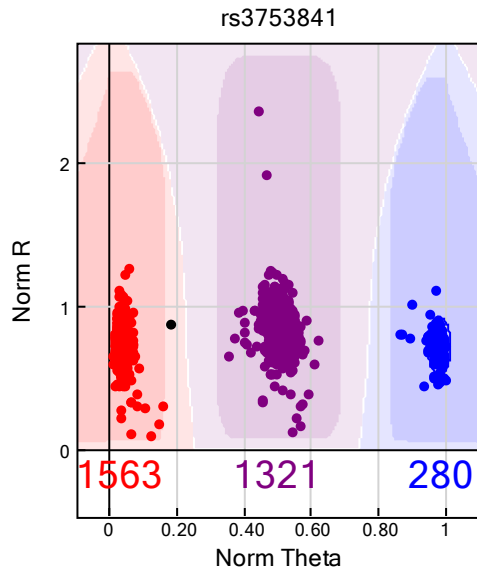

Each of the colors red, purple, and blue denote the different genotypes at the 3 SNPs. Red and blue represent homozygous genotypes, and purple represent the heterozygous genotype (carrier state). For all three SNPs rs11024102, rs1015213, and rs3753841, the three genotypes are clearly distinguishable.

### Supplementary Figure 5b

Sequenom genotyping cluster plots for the three genome-wide significant SNPs in Stage 2

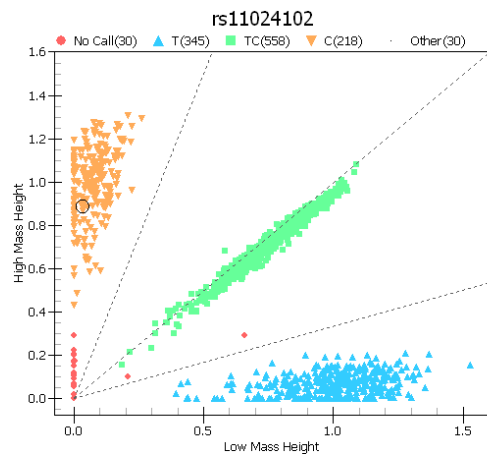

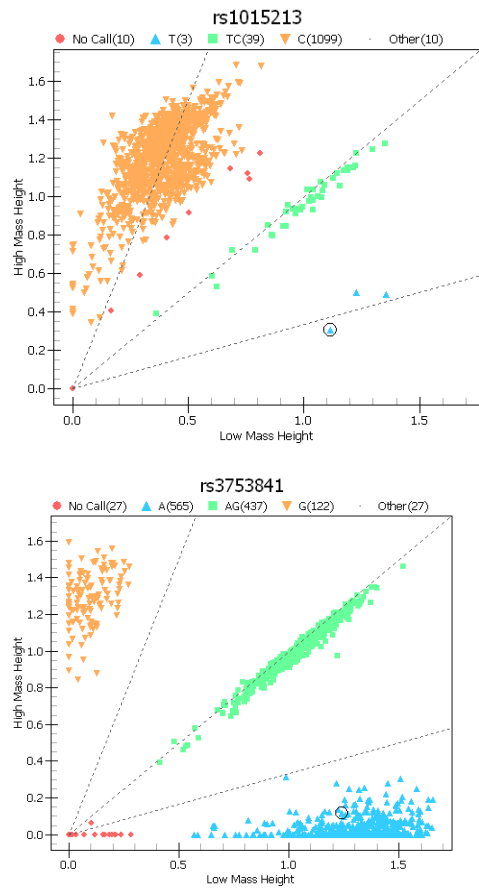

Each of the brown, green, and blue denote the different genotypes at the 3 SNPs. Brown and blue represent homozygous genotypes, and green represent the heterozygous genotype (carrier state). For all three SNPs rs11024102, rs1015213, and rs3753841, the three genotypes are clearly distinguishable.

### **Supplementary references**

1. Bei, J.X. *et al.* A genome-wide association study of nasopharyngeal carcinoma identifies three new susceptibility loci. *Nat Genet* **42**, 599-603 (2010).
2. Khor, C.C. *et al.* Genome-wide association study identifies susceptibility loci for dengue shock syndrome at MICB and PLCE1. *Nat Genet* **43**, 1139-41 (2011).
3. Vithana, E.N. *et al.* Collagen-related genes influence the glaucoma risk factor, central corneal thickness. *Hum Mol Genet* **20**, 649-58 (2011).
4. Arvind, H. *et al.* Methods and design of the Chennai Glaucoma Study. *Ophthalmic Epidemiol* **10**, 337-48 (2003).

5. Cornes, B.K. *et al.* Identification of four novel variants that influence central corneal thickness in multi-ethnic Asian populations. *Hum Mol Genet* **21**, 437-45 (2012).
6. Strange, A. *et al.* A genome-wide association study identifies new psoriasis susceptibility loci and an interaction between HLA-C and ERAP1. *Nat Genet* **42**, 985-90 (2010).
7. Evans, D.M. *et al.* Interaction between ERAP1 and HLA-B27 in ankylosing spondylitis implicates peptide handling in the mechanism for HLA-B27 in disease susceptibility. *Nat Genet* **43**, 761-7 (2011).
8. Bellenguez, C. *et al.* Genome-wide association study identifies a variant in HDAC9 associated with large vessel ischemic stroke. *Nat Genet* **44**, 328-333 (2012).
9. Barrett, J.C. *et al.* Genome-wide association study of ulcerative colitis identifies three new susceptibility loci, including the HNF4A region. *Nat Genet* **41**, 1330-4 (2009).
10. Khor, C.C. *et al.* Genome-wide association study identifies FCGR2A as a susceptibility locus for Kawasaki disease. *Nat Genet* **43**, 1241-6 (2011).
11. Davila, S. *et al.* Genome-wide association study identifies variants in the CFH region associated with host susceptibility to meningococcal disease. *Nat Genet* **42**, 772-6 (2010).
12. Foster, P.J., Buhrmann, R., Quigley, H.A. & Johnson, G.J. The definition and classification of glaucoma in prevalence surveys. *Br J Ophthalmol* **86**, 238-42 (2002).
13. Ong, E.L. *et al.* The utility of symptoms in identification of primary angle-closure in a high-risk population. *Ophthalmology* **115**, 2024-9 (2008).
14. Gharavi, A.G. *et al.* Genome-wide association study identifies susceptibility loci for IgA nephropathy. *Nat Genet* **43**, 321-7 (2011).
15. Purcell, S., Cherny, S.S. & Sham, P.C. Genetic Power Calculator: design of linkage and association genetic mapping studies of complex traits. *Bioinformatics* **19**, 149-50 (2003).
